# Supplementary material for: The entorhinal cortex modulates trace fear memory formation and neuroplasticity in the mouse lateral amygdala via cholecystokinin
Source: eLife. 2021 Nov 15;10:e69333. doi: 10.7554/eLife.69333 (PMC8629425; doi:10.7554/eLife.69333)
Supplement: Figure 1—source data 1. [file elife-69333-fig1-data1.xlsx]

## Sheet: Figure 1a-c
		CCKKO	Baseline		Test				C57	Baseline		Test
	subject		Before	After	Before	After		subject		Before	After	Before	After
	CCK-KO-L1R0	CS	0.100741	0.0651852	0.222222	0.57		C57-L1R0	CS	0.0233333	0.0722222	0.0855556	0.788889
	L0R1	CS	0.0503704	0.0848148	0.264444	0.628889		L0R1	CS	0.0477778	0.0725926	0.151111	0.942222
	L1R1	CS	0.0740741	0.0548148	0.183889	0.229444		L1R1	CS	0.119259	0.118889	0.253333	0.662222
	L0R0	CS	0.012963	0.0296296	0.163333	0.546667		L0R0	CS	0.108519	0.01	0.176042	0.716667
	CCK-Cre-ER-1#	CS	0.0861111	0.172685	0.238194	0.369444		C57-1#	CS	0.0421296	0.0444444	0.186111	0.794444
	CCK-Cre-ER-2#	CS	0.0587963	0.114815	0.230556	0.23125		C57-2#	CS	0.0657407	0.0921296	0.163889	0.334722
	CCK-Cre-ER-3#	CS	0.0277778	0.125	0.267361	0.376389		C57-3#	CS	0.0222222	0.0185185	0.0708333	0.552778
	CCK-Cre-ER-4#	CS	0.0643519	0.102778	0.263889	0.270833		C57-4#	CS	0.0611111	0.173611	0.197917	0.688889
	CCK-Cre-ER-5#	CS	0.0439815	0.15463	0.369444	0.508333		C57-136#	CS	0.0453704	0.0657407	0.169444	0.431944
	CCK-Cre-ER-6#	CS	0.075	0.0569444	0.0986111	0.197222		C57-147#	CS	0.0759259	0.13287	0.204167	0.601389
								C57-L0R1-WT	CS	0.147569	0.220139	0.0847222	0.622222
								C57-L0R1-BT	CS	0.0726852	0.111111	0.0708333	0.522222
								C57-L1R1-WT	CS	0.124074	0.183333	0.0722222	0.619444
								C57-L1R1-BT	CS	0.0236111	0.0671296	0.0680556	0.348611
	origin plot		After CS					origin plot		Before CS
			CCKKO baseline	C57 baseline	CCKKO test	C57 test				CCKKO baseline	C57 baseline	CCKKO test	C57 test
			0.0651852	0.0722222	0.57	0.788889				0.100741	0.0233333	0.222222	0.0855556
			0.0848148	0.0725926	0.628889	0.942222				0.0503704	0.0477778	0.264444	0.151111
			0.0548148	0.118889	0.229444	0.662222				0.0740741	0.119259	0.183889	0.253333
			0.0296296	0.01	0.546667	0.716667				0.012963	0.108519	0.163333	0.176042
			0.172685	0.0444444	0.369444	0.794444				0.0861111	0.0421296	0.238194	0.186111
			0.114815	0.0921296	0.23125	0.334722				0.0587963	0.0657407	0.230556	0.163889
			0.125	0.0185185	0.376389	0.552778				0.0277778	0.0222222	0.267361	0.0708333
			0.102778	0.173611	0.270833	0.688889				0.0643519	0.0611111	0.263889	0.197917
			0.15463	0.0657407	0.508333	0.431944				0.0439815	0.0453704	0.369444	0.169444
			0.0569444	0.13287	0.197222	0.601389				0.075	0.0759259	0.0986111	0.204167
				0.220139		0.622222					0.147569		0.0847222
				0.111111		0.522222					0.0726852		0.0708333
				0.183333		0.619444					0.124074		0.0722222
				0.0671296		0.348611					0.0236111		0.0680556
		Strain	baseline	post-training test					Strain	baseline	post-training test
	anova	CCKKO	0.0651852	0.57				anova	CCKKO	0.100741	0.222222
		CCKKO	0.0848148	0.628889					CCKKO	0.0503704	0.264444
		CCKKO	0.0548148	0.229444					CCKKO	0.0740741	0.183889
		CCKKO	0.0296296	0.546667					CCKKO	0.012963	0.163333
		CCKKO	0.172685	0.369444					CCKKO	0.0861111	0.238194
		CCKKO	0.114815	0.23125					CCKKO	0.0587963	0.230556
		CCKKO	0.125	0.376389					CCKKO	0.0277778	0.267361
		CCKKO	0.102778	0.270833					CCKKO	0.0643519	0.263889
		CCKKO	0.15463	0.508333					CCKKO	0.0439815	0.369444
		CCKKO	0.0569444	0.197222					CCKKO	0.075	0.0986111
		WT	0.0722222	0.788889					WT	0.0233333	0.0855556
		WT	0.0725926	0.942222					WT	0.0477778	0.151111
		WT	0.118889	0.662222					WT	0.119259	0.253333
		WT	0.01	0.716667					WT	0.108519	0.176042
		WT	0.0444444	0.794444					WT	0.0421296	0.186111
		WT	0.0921296	0.334722					WT	0.0657407	0.163889
		WT	0.0185185	0.552778					WT	0.0222222	0.0708333
		WT	0.173611	0.688889					WT	0.0611111	0.197917
		WT	0.0657407	0.431944					WT	0.0453704	0.169444
		WT	0.13287	0.601389					WT	0.0759259	0.204167
		WT	0.220139	0.622222					WT	0.147569	0.0847222
		WT	0.111111	0.522222					WT	0.0726852	0.0708333
		WT	0.183333	0.619444					WT	0.124074	0.0722222
		WT	0.0671296	0.348611					WT	0.0236111	0.0680556

## Sheet: Figure 1e-g
		baseline		test						baseline		test
		before	after	before	after					before	after	before	after
CCK-KO-L1R0
CCK-KO-L0R1	2.7	0.0777778	0.118056	0.304167	0.4			WT-L1R0	2.7	0.0958333	0.291667	0.116667	0.9625
CCK-KO-L1R1	2.7	0.0375	0.16875	0.304167	0.670833			WT-L0R1	2.7	0.191667	0.245833	0.125	0.508333
CCK-KO-L2R0	2.7	0.0625	0.295833	0.208333	0.191667			WT-L1R1	2.7	0.125	0.220833	0.0458333	0.425
CCK-KO-L0R2	2.7	0.0861111	0.0638889	0.0541667	0.154167			WT-L2R0	2.7	0.191667	0.2625	0.1875	0.595833
CCK-KO-L1R2	2.7	0.0791667	0.0194444	0.2	0.204167			WT-L0R2	2.7	0.05	0.222222	0.0875	0.454167
CCK-KO-L2R1	2.7	0.0833333	0.0416667	0.0375	0.145833			WT-L0R0	2.7	0.218056	0.384722	0.141667	0.8625
CCK-KO-L0R0	2.7	0.0972222	0.105556	0.270833	0.475		batch-2	L1R0	CS	0.0708333	0.0680556	0.158333	0.691667
ZX-L1R0-CCK-KO	CS	0.0291667	0.0652778	0.116667	0.816667		batch-2	WT-L0R1	CS	0.0680556	0.218056	0.208333	0.766667
ZX-L0R1-CCK-KO	CS	0.0333333	0.0486111	0.175	0.291667		batch-2	L0R0	CS	0.0638889	0.169444	0.1	0.5875
ZX-L1R1-CCK-KO	CS	0.0388889	0.163889	0.129167	0.479167		batch-2	WT-L2R0	CS	0.0236111	0.0777778	0.0875	0.625
ZX-L0R0-CCK-KO	CS	0.0486111	0.0833333	0.108333	0.316667		batch-2	L2R1	CS	0.0333333	0.0875	0.108333	0.8125
ZN-L1R0-CCK-KO	CS	0.125	0.133333	0.0291667	0.608333
ZN-L0R1-CCK-KO	CS	0.243056	0.194444	0.1125	0.545833
ZN-L0R2-CCK-KO	CS	0.104167	0.45	0.191667	0.441667
		CS-after								CS-before
	origin plot	CCKKO-baseline	WT-baseline	CCKKO-test	WT-test					CCKKO-baseline	WT-baseline	CCKKO-test	WT-test
		0.118056	0.291667	0.4	0.9625					0.0777778	0.0958333	0.304167	0.116667
		0.16875	0.245833	0.670833	0.508333					0.0375	0.191667	0.304167	0.125
		0.295833	0.220833	0.191667	0.425					0.0625	0.125	0.208333	0.0458333
		0.0638889	0.2625	0.154167	0.595833					0.0861111	0.191667	0.0541667	0.1875
		0.0194444	0.222222	0.204167	0.454167					0.0791667	0.05	0.2	0.0875
		0.0416667	0.384722	0.145833	0.8625					0.0833333	0.218056	0.0375	0.141667
		0.105556	0.0680556	0.475	0.691667					0.0972222	0.0708333	0.270833	0.158333
		0.0652778	0.218056	0.816667	0.766667					0.0291667	0.0680556	0.116667	0.208333
		0.0486111	0.169444	0.291667	0.5875					0.0333333	0.0638889	0.175	0.1
		0.163889	0.0777778	0.479167	0.625					0.0388889	0.0236111	0.129167	0.0875
		0.0833333	0.0875	0.316667	0.8125					0.0486111	0.0333333	0.108333	0.108333
		0.133333		0.608333						0.125		0.0291667
		0.194444		0.545833						0.243056		0.1125
		0.45		0.441667						0.104167		0.191667
	CS-after								CS-before
	anova	strain	baseline	post-training					anova	strain	baseline	post-training
		CCKKO	0.118056	0.4						CCKKO	0.0777778	0.304167
		CCKKO	0.16875	0.670833						CCKKO	0.0375	0.304167
		CCKKO	0.295833	0.191667						CCKKO	0.0625	0.208333
		CCKKO	0.0638889	0.154167						CCKKO	0.0861111	0.0541667
		CCKKO	0.0194444	0.204167						CCKKO	0.0791667	0.2
		CCKKO	0.0416667	0.145833						CCKKO	0.0833333	0.0375
		CCKKO	0.105556	0.475						CCKKO	0.0972222	0.270833
		CCKKO	0.0652778	0.816667						CCKKO	0.0291667	0.116667
		CCKKO	0.0486111	0.291667						CCKKO	0.0333333	0.175
		CCKKO	0.163889	0.479167						CCKKO	0.0388889	0.129167
		CCKKO	0.0833333	0.316667						CCKKO	0.0486111	0.108333
		CCKKO	0.133333	0.608333						CCKKO	0.125	0.0291667
		CCKKO	0.194444	0.545833						CCKKO	0.243056	0.1125
		CCKKO	0.45	0.441667						CCKKO	0.104167	0.191667
		WT	0.291667	0.9625						WT	0.0958333	0.116667
		WT	0.245833	0.508333						WT	0.191667	0.125
		WT	0.220833	0.425						WT	0.125	0.0458333
		WT	0.2625	0.595833						WT	0.191667	0.1875
		WT	0.222222	0.454167						WT	0.05	0.0875
		WT	0.384722	0.8625						WT	0.218056	0.141667
		WT	0.0680556	0.691667						WT	0.0708333	0.158333
		WT	0.218056	0.766667						WT	0.0680556	0.208333
		WT	0.169444	0.5875						WT	0.0638889	0.1
		WT	0.0777778	0.625						WT	0.0236111	0.0875
		WT	0.0875	0.8125						WT	0.0333333	0.108333
