# Supplementary material for: The entorhinal cortex modulates trace fear memory formation and neuroplasticity in the mouse lateral amygdala via cholecystokinin
Source: eLife. 2021 Nov 15;10:e69333. doi: 10.7554/eLife.69333 (PMC8629425; doi:10.7554/eLife.69333)
Supplement: Figure 2—source data 1. [file elife-69333-fig2-data1.xlsx]

## Sheet: WT-AEP LTP
0826-p1-ch2	0826-p2-ch2	0827-p1-ch4	0827-p2-ch2	0829-p1-ch2	0829-R-p3-ch2	0830-p2-ch3	0830-R-p4-ch3	0505-s2-ch2	0509-s1-ch3	0509-s2-ch3	0510-s2-ch3		time	average	stdv	sem
	0.938036	1.1893	1.0563	1.30393	0.801053	1.13076	1.07218	0.407266	1.23971	0.668031	0.432254		-30	0.930801	0.313969	0.0946652
0.772379	1.28806	0.839466	1.20475	0.34162	0.68076	1.13681	1.03627	0.173234	1.10609	1.02655	1.70836		-28	0.942863	0.417351	0.120479
	0.880007	1.22319	0.563793	1.10544	0.944392	0.940649	1.03704	1.11337	1.17192	0.697234	1.34734		-26	1.00222	0.22984	0.0692994
	0.904363	1.17654	0.419232	0.99736	0.514727	1.16747	0.865648	0.601637	0.708368	1.14175	0.807884		-24	0.845908	0.26434	0.0797014
0.53571	0.72671	1.25901	1.24304	2.01125	1.04658	1.07462	1.07117	1.45043	1.10823	0.849243	0.153056		-22	1.04409	0.465457	0.134366
0.83294	1.36533	1.09786	1.08865	0.743634	1.44648	0.745593	0.532328	1.48762	1.69322	1.01388	1.39907		-20	1.12055	0.360643	0.104109
0.859406	1.39963	1.04711	0.497429		0.943341	0.898007	0.905291	1.16799		0.993228	1.35191		-18	1.00634	0.260035	0.0822302
0.499425	1.09268	0.867016	1.47935	0.732092	0.946997	0.781656	0.731218	1.05455	1.13796	0.862346	1.28588		-16	0.95593	0.269765	0.0778745
1.33964	0.626144	0.40507	0.672684	1.11631	1.34249	0.547964	1.45767	1.20093	0.722471	0.990692	0.644291		-14	0.922196	0.360832	0.104163
1.09442	1.30794	0.695294	0.95818	0.892204	1.0256	1.35454	1.32052	1.11849	0.312244	1.32432	0.966817		-12	1.03088	0.304651	0.0879453
1.30077	0.707393	0.997345	1.22383	0.452376	1.16738	0.523996	0.905605	1.86774	1.73182	1.13667	1.29936		-10	1.10952	0.430904	0.124391
1.77188	0.625371	1.22409	1.15422	0.480524	0.808163	1.08573	0.93162	0.455058	0.620571	0.824217	0.886562		-8	0.905668	0.370103	0.10684
0.385933	1.39602	1.04747	1.25221	1.45187	1.00574	1.3578	0.71899	1.54817	0.608267	1.1963	0.317101		-6	1.02382	0.42244	0.121948
1.2106	0.721827	1.41899	0.621924	0.810432	1.08753	1.13945	1.27547	0.208976	0.326616	1.17311	0.534624		-4	0.877463	0.395965	0.114305
0.268992	1.02049	0.335351	1.56441	1.56095	1.23878	1.11495	1.13897	0.794049	1.39115	1.10242	0.915124		-2	1.03714	0.415153	0.119844
0	0	0	0	0	0	0	0	0	0	0	0			0	0	0
0	0	0	0	0	0	0	0	0	0	0	0			0	0	0
0	0	0	0	0	0	0	0	0	0	0	0			0	0	0
0.451355	1.92564	1.62783	0.901411	1.88955	1.64668	1.77587	1.41386	0.787623	0.869839	0.910666	1.25106		2	1.28761	0.49404	0.142617
2.129	1.26175	1.031	1.91849	1.86942	1.31162	1.22408	1.3263	1.44081	0.721838	1.28608	2.08445		4	1.46707	0.437881	0.126405
1.18551	1.14488	1.72123	1.83203	2.48607	0.973016	1.52415	1.24092	1.28993	1.29587	1.04961	0.730052		6	1.37277	0.466045	0.134536
	0.714299	1.32257	1.74222	2.87357	1.30563	1.39005	1.39247	1.37587	-0.02801	1.13689	1.78393		8	1.3645	0.70826	0.213548
	1.09738	1.57085	1.02014	2.42145	0.482243	1.42636	1.51742	1.54393	1.08367	0.914397	0.501274		10	1.23446	0.550277	0.165915
1.12001	1.0664	1.5439	1.09937	2.69928	0.741291	1.14764	1.33157	1.52249	1.01888	0.579465	1.44306		12	1.27611	0.534482	0.154292
2.65422	1.69735	1.83052	1.03877	0.988332	0.869309	1.14987	1.03926	1.67709	1.15266	0.947285	1.3928		14	1.36979	0.518137	0.149573
2.32865	1.41443	1.43096	1.12096	1.35689	1.22606	1.55259	0.636455	2.19507	0.72612	0.59124	1.56662		16	1.3455	0.548741	0.158408
3.91985	1.322	1.98567	1.47716	1.85846	1.26044	1.2287	1.12761	1.04898	1.09014	0.70804	0.536714		18	1.46365	0.875558	0.252752
1.01671	0.961011	2.08796	1.36769		1.26747	1.44421	1.40432	1.16751	1.01241	1.51033	1.55912		20	1.34534	0.322862	0.0973466
2.92203	0.543335	2.00158	1.52572	2.34686	1.3453	0.954611	1.33731	1.80837	0.640714		1.13071		22	1.50514	0.722785	0.217928
2.69633	1.30695	0.893208	1.43367	2.83059	1.02862	1.62214	0.892347	1.01912	1.12098	0.628968	1.5561		24	1.41909	0.692564	0.199926
2.37422	1.29147	1.08054	1.55772	1.60939	1.38201	1.14312	2.34406	2.16495	0.533464	1.40468	0.688382		26	1.4645	0.594042	0.171485
2.53257	1.56043	1.7281	1.66345	3.73869	1.61827	1.4052	1.23887	1.66087	0.969209	1.66749	0.277161		28	1.67169	0.838221	0.241974
0.88536	0.902472	1.36151	1.7973	3.51068	1.88809	1.62662	1.4248	0.803163	1.41356	1.65824	0.81485		30	1.50722	0.741278	0.213988
	0.792335	1.50067	2.73011	4.28648	0.976532	1.18094	1.60633	1.45114	1.26673	1.39111	1.68803		32	1.71549	0.987864	0.297852
4.70195	1.04737	1.42445	1.66937	1.92057	1.40634	1.65732	1.46915	1.47217	1.46677	1.01582	0.619826		34	1.65593	1.01902	0.294165
4.48076	1.85518	1.90828	2.043	2.04045	1.26652	1.15212	1.26082	1.5028	2.30098	0.521462	0.557961		36	1.74086	1.03519	0.298834
	1.40341	1.03013	2.14318	2.04819	0.853145	1.33675	0.947681	1.90577	1.22535	0.949827	2.20195		38	1.45867	0.520687	0.156993
0.854867	1.49553	1.42086		2.23915		0.901463	1.28448	1.58878	1.4517	1.09347	1.18952		40	1.35198	0.398094	0.125888
1.56861	1.75882	1.67126	2.22688	2.21647	1.15971	1.52471	1.27825	0.89656	1.44291	1.08168	0.555319		42	1.44843	0.496459	0.143315
2.96537	1.57635	1.60373	1.27583	1.72443	1.12179	0.610303	1.13439	1.03378	0.912399	1.39529	1.04775		44	1.36679	0.595282	0.171843
	1.17117	1.64316	2.0394	0.758218	1.22509	1.21912	1.39839	1.92737	0.931705	1.31108	0.988449		46	1.32847	0.401739	0.121129
2.47024	1.44037	2.16824	1.61174	1.30814	1.51183	1.14212	1.45993	0.621836	1.23901	1.73576	1.61561		48	1.52707	0.473865	0.136793
0.624257	1.31566	1.52504	1.34887	0.72619	0.691338	1.72398	1.75059	1.70954	1.81998	1.90041	0.849646		50	1.33213	0.484435	0.139844
2.60025	0.740298	1.82361	1.18986	2.44934	0.779464	1.00513	1.53063		1.59319	0.265016	0.744083		52	1.33826	0.739755	0.223044
3.25879	1.27812	1.43942	1.49723	1.30408	1.28157	0.996486	0.726439		1.63699	0.521912	1.28571		54	1.38425	0.704147	0.212308
2.11298	1.10641	1.3226	2.57381	1.98608	0.67113	1.21894	1.45219	0.773577	1.57509	1.57448	2.13383		56	1.54176	0.575205	0.166047
3.16995	1.6056	1.50596	1.12795	0.775893	1.0197	1.41294	1.55084	1.05483	1.64642	1.72814	1.28137		58	1.48997	0.604662	0.174551
outlier

## Sheet: WT_v2 -AEP LTP
0826-p1-ch2	0826-p2-ch2	0827-p1-ch4	0827-p2-ch2	0829-p1-ch2	0829-R-p3-ch2	0830-p2-ch3	0830-R-p4-ch3	0505-s2-ch2	0509-s1-ch3	0509-s2-ch3	0510-s2-ch3		time	average	stdv	sem
	0.938036	1.1893	1.0563	1.30393	0.801053	1.13076	1.07218	0.407266	1.23971	0.668031	0.432254		-30	0.930801	0.313969	0.0946652
	1.28806	0.839466	1.20475	0.34162	0.68076	1.13681	1.03627	0.173234	1.10609	1.02655	1.70836		-28	0.958361	0.434085	0.130881
	0.880007	1.22319	0.563793	1.10544	0.944392	0.940649	1.03704	1.11337	1.17192	0.697234	1.34734		-26	1.00222	0.22984	0.0692994
	0.904363	1.17654	0.419232	0.99736	0.514727	1.16747	0.865648	0.601637	0.708368	1.14175	0.807884		-24	0.845908	0.26434	0.0797014
	0.72671	1.25901	1.24304	2.01125	1.04658	1.07462	1.07117	1.45043	1.10823	0.849243	0.153056		-22	1.0903	0.458389	0.13821
	1.36533	1.09786	1.08865	0.743634	1.44648	0.745593	0.532328	1.48762	1.69322	1.01388	1.39907		-20	1.1467	0.366123	0.11039
	1.39963	1.04711	0.497429		0.943341	0.898007	0.905291	1.16799		0.993228	1.35191		-18	1.02266	0.270318	0.090106
	1.09268	0.867016	1.47935	0.732092	0.946997	0.781656	0.731218	1.05455	1.13796	0.862346	1.28588		-16	0.997431	0.239408	0.0721843
	0.626144	0.40507	0.672684	1.11631	1.34249	0.547964	1.45767	1.20093	0.722471	0.990692	0.644291		-14	0.884247	0.352434	0.106263
	1.30794	0.695294	0.95818	0.892204	1.0256	1.35454	1.32052	1.11849	0.312244	1.32432	0.966817		-12	1.0251	0.318831	0.0961312
	0.707393	0.997345	1.22383	0.452376	1.16738	0.523996	0.905605	1.86774	1.73182	1.13667	1.29936		-10	1.09214	0.4475	0.134926
	0.625371	1.22409	1.15422	0.480524	0.808163	1.08573	0.93162	0.455058	0.620571	0.824217	0.886562		-8	0.826921	0.262337	0.0790977
	1.39602	1.04747	1.25221	1.45187	1.00574	1.3578	0.71899	1.54817	0.608267	1.1963	0.317101		-6	1.08181	0.389758	0.117516
	0.721827	1.41899	0.621924	0.810432	1.08753	1.13945	1.27547	0.208976	0.326616	1.17311	0.534624		-4	0.847178	0.400451	0.12074
	1.02049	0.335351	1.56441	1.56095	1.23878	1.11495	1.13897	0.794049	1.39115	1.10242	0.915124		-2	1.10697	0.353862	0.106694
	0	0	0	0	0	0	0	0	0	0	0			0	0	0
	0	0	0	0	0	0	0	0	0	0	0			0	0	0
	0	0	0	0	0	0	0	0	0	0	0			0	0	0
	1.92564	1.62783	0.901411	1.88955	1.64668	1.77587	1.41386	0.787623	0.869839	0.910666	1.25106		2	1.36364	0.438398	0.132182
	1.26175	1.031	1.91849	1.86942	1.31162	1.22408	1.3263	1.44081	0.721838	1.28608	2.08445		4	1.40689	0.403875	0.121773
	1.14488	1.72123	1.83203	2.48607	0.973016	1.52415	1.24092	1.28993	1.29587	1.04961	0.730052		6	1.3898	0.484864	0.146192
	0.714299	1.32257	1.74222	2.87357	1.30563	1.39005	1.39247	1.37587	-0.02801	1.13689	1.78393		8	1.3645	0.70826	0.213548
	1.09738	1.57085	1.02014	2.42145	0.482243	1.42636	1.51742	1.54393	1.08367	0.914397	0.501274		10	1.23446	0.550277	0.165915
	1.0664	1.5439	1.09937	2.69928	0.741291	1.14764	1.33157	1.52249	1.01888	0.579465	1.44306		12	1.2903	0.558193	0.168302
	1.69735	1.83052	1.03877	0.988332	0.869309	1.14987	1.03926	1.67709	1.15266	0.947285	1.3928		14	1.25302	0.339615	0.102398
	1.41443	1.43096	1.12096	1.35689	1.22606	1.55259	0.636455	2.19507	0.72612	0.59124	1.56662		16	1.25613	0.475168	0.143268
	1.322	1.98567	1.47716	1.85846	1.26044	1.2287	1.12761	1.04898	1.09014	0.70804	0.536714		18	1.24036	0.430257	0.129727
	0.961011	2.08796	1.36769		1.26747	1.44421	1.40432	1.16751	1.01241	1.51033	1.55912		20	1.3782	0.320348	0.101303
	0.543335	2.00158	1.52572	2.34686	1.3453	0.954611	1.33731	1.80837	0.640714		1.13071		22	1.36345	0.578874	0.183056
	1.30695	0.893208	1.43367	2.83059	1.02862	1.62214	0.892347	1.01912	1.12098	0.628968	1.5561		24	1.30297	0.591306	0.178286
	1.29147	1.08054	1.55772	1.60939	1.38201	1.14312	2.34406	2.16495	0.533464	1.40468	0.688382		26	1.3818	0.545796	0.164564
	1.56043	1.7281	1.66345	3.73869	1.61827	1.4052	1.23887	1.66087	0.969209	1.66749	0.277161		28	1.59343	0.831882	0.250822
	0.902472	1.36151	1.7973	3.51068	1.88809	1.62662	1.4248	0.803163	1.41356	1.65824	0.81485		30	1.56375	0.749837	0.226084
	0.792335	1.50067	2.73011	4.28648	0.976532	1.18094	1.60633	1.45114	1.26673	1.39111	1.68803		32	1.71549	0.987864	0.297852
	1.04737	1.42445	1.66937	1.92057	1.40634	1.65732	1.46915	1.47217	1.46677	1.01582	0.619826		34	1.37901	0.360641	0.108737
	1.85518	1.90828	2.043	2.04045	1.26652	1.15212	1.26082	1.5028	2.30098	0.521462	0.557961		36	1.49178	0.599861	0.180865
	1.40341	1.03013	2.14318	2.04819	0.853145	1.33675	0.947681	1.90577	1.22535	0.949827	2.20195		38	1.45867	0.520687	0.156993
	1.49553	1.42086		2.23915		0.901463	1.28448	1.58878	1.4517	1.09347	1.18952		40	1.40722	0.379428	0.126476
	1.75882	1.67126	2.22688	2.21647	1.15971	1.52471	1.27825	0.89656	1.44291	1.08168	0.555319		42	1.43751	0.519176	0.156537
	1.57635	1.60373	1.27583	1.72443	1.12179	0.610303	1.13439	1.03378	0.912399	1.39529	1.04775		44	1.22146	0.333192	0.100461
	1.17117	1.64316	2.0394	0.758218	1.22509	1.21912	1.39839	1.92737	0.931705	1.31108	0.988449		46	1.32847	0.401739	0.121129
	1.44037	2.16824	1.61174	1.30814	1.51183	1.14212	1.45993	0.621836	1.23901	1.73576	1.61561		48	1.44133	0.387246	0.116759
	1.31566	1.52504	1.34887	0.72619	0.691338	1.72398	1.75059	1.70954	1.81998	1.90041	0.849646		50	1.39648	0.45109	0.136009
	0.740298	1.82361	1.18986	2.44934	0.779464	1.00513	1.53063		1.59319	0.265016	0.744083		52	1.21206	0.642953	0.20332
	1.27812	1.43942	1.49723	1.30408	1.28157	0.996486	0.726439		1.63699	0.521912	1.28571		54	1.19679	0.348479	0.110199
	1.10641	1.3226	2.57381	1.98608	0.67113	1.21894	1.45219	0.773577	1.57509	1.57448	2.13383		56	1.48983	0.57302	0.172772
	1.6056	1.50596	1.12795	0.775893	1.0197	1.41294	1.55084	1.05483	1.64642	1.72814	1.28137		58	1.33724	0.307059	0.0925817

## Sheet: CCK_KO-AEP
20170410-s2-ch3	20170412-s2-ch3	20170419-s2-ch2	20170420-s1-ch2	20170420-s2-ch2	20170403-s2-ch2	20170405-s1-ch3	20170405-s2-ch2	20170406-s2-ch3	20170322-s1-ch3	20170323-s1-ch2	20170323-s2-ch2	20170330-s1-ch3	20170331-s1-ch2	20170331-s2-ch2		Time	Average	STD	SEM
0.773636	0.991623	0.83219	0.992355	1.16183	1.47487	1.33877	0.853214	1.00442	1.34058	0.92947	0.836565	1.09689	1.052	0.866939		-30	1.03636	0.211322	0.054563
0.779439	1.04139	1.16857	1.18948	0.629441	1.34994	0.820067		0.914956	1.03318	0.370823	1.64469	0.786233	1.07666	0.539514		-28	0.95317	0.335074	0.0895522
1.34451	1.09207	0.861909	0.963535	0.85102	1.08366	1.11743	0.737294	1.14787	1.14617		0.762305	1.09476	1.13145	0.580079		-26	0.993861	0.2078	0.055537
0.900716	1.09602	0.640859	0.920659	1.13282	0.767379	0.626213	1.0967	1.01974	0.527082	0.879394	0.496083	1.05566	1.00842	1.13749		-24	0.887016	0.223333	0.0576643
0.929959	1.09419	0.653045	1.0172	0.904814	0.806628	1.1246	0.76179	0.873467	0.639322	0.967157		0.830425	0.632173	1.17474		-22	0.886394	0.178508	0.0477084
1.17554	1.09079	0.766563	1.03898	1.18144	0.68767	1.17442	0.94022	1.11132	1.51566	0.867702	1.38036	0.938669	0.70841	1.52694		-20	1.07365	0.265264	0.0684909
1.28241	0.817344	0.512287	0.940115	1.12378	0.701037	0.839579	0.986097	0.675892	1.2332	1.43239	0.996844	1.17691	0.689523	0.561801		-18	0.93128	0.277806	0.0717293
1.01506	1.06968	0.991735	1.03577	1.2869	1.03546	1.08012	0.995123	1.2605	1.48719	0.745116	1.19133		1.01737	0.416754		-16	1.04487	0.250466	0.0669398
0.712051	1.07969	0.959764	0.966925	1.45902	1.44262	1.02849	1.06693	1.1959	0.798974	1.09033	0.576093	0.9173	1.44191	1.31143		-14	1.06983	0.266793	0.0688858
1.28091	0.890673	0.942789	1.01324	0.94751	0.694808	0.93983	1.28717	0.699422	0.52158	1.37141	1.40262	1.27094	1.15412	1.5677		-12	1.06565	0.298853	0.0771634
1.04764	1.05988	1.40575	0.88952	1.1615	1.01304	1.20286	1.20788	0.786837	1.21761	0.622205	1.02654	0.880533	0.726215	1.16814		-10	1.02774	0.213055	0.0550105
1.07734	0.836855	1.41347	0.989861	0.845227	1.21945	0.859415	1.17876	0.940871	0.769943	0.725973		0.513422	1.42328	0.646667		-8	0.960038	0.2742	0.073283
1.08706	0.898008	1.1535	1.05774	0.514757	0.5188	0.89561		1.38056	0.94492	1.20684	1.0344	1.24141	0.960652	1.15174		-6	1.00329	0.247653	0.0661882
0.919426	1.01475	1.3918	1.01263	1.10663		0.995777	1.0965	1.15656	1.43187	0.85672	0.942649	0.799507	0.980165	1.92981		-4	1.11677	0.294849	0.0788016
1.06043	0.792787	1.35006	0.887943	0.932099	1.0136	0.988403	0.881386	0.905246	0.392728	1.02805	0.709513	0.879718	0.930128			-2	0.910865	0.209713	0.0560482
0	0	0	0	0	0	0	0	0	0	0	0	0	0	0			0	0	0
0	0	0	0	0	0	0	0	0	0	0	0	0	0	0			0	0	0
0	0	0	0	0	0	0	0	0	0	0	0	0	0	0			0	0	0
0.698573	0.951937	1.1828	0.596585	1.14878	1.01723	0.683799	1.16165	0.543083	0.577133	0.116903	2.54326	0.868017	0.998664	1.11951		2	0.947195	0.532973	0.137613
1.02044	0.670173	0.537045	0.702867	0.689098	0.994595	0.592065	1.19228	0.838773	0.987601	1.27071	0.24144	0.418616	0.883629	1.21806		4	0.81716	0.302889	0.0782057
0.801697	0.945674	0.574164	0.823548	0.773968	0.91981	1.38217	0.987374	0.487313	0.907426	0.909209	2.06676	0.813144	1.1561	1.01673		6	0.971005	0.370624	0.0956948
0.91115	0.840611	0.854478	0.78955	1.05776	0.925371	1.16076	0.554161	0.743851	1.13475	0.544317	1.41277	0.897035	0.654092	0.962102		8	0.896184	0.233621	0.0603208
0.892316	1.04923	1.02399	0.76158	1.10621	1.03262	0.712197	0.926203	0.903948	1.07715	1.12645	1.6959	1.11454	0.660397	1.89668		10	1.06529	0.333384	0.0860795
0.829277	1.09671	0.790108	0.862004	1.15399	1.33348	0.412814	1.34405	0.451257	0.934801	1.36811	0.068496	1.61114	0.795334	1.27284		12	0.954961	0.419834	0.108401
0.852838	0.932851	0.919353	0.704356	0.681103	0.704253	0.714046	0.793089	0.92407	1.28688	0.90397	0.456077	1.2874	0.858993	0.349569		14	0.82459	0.25227	0.065136
0.74554	0.750404	1.20855	0.710503	0.752152	0.781306	1.13044	0.605937	0.980379	1.21574	2.52394	2.12898	1.10412	0.983398			16	1.11581	0.554919	0.148308
0.968364	0.421047	0.820951	0.885876	1.79529	0.921546	0.4912	0.718737	0.570733	1.52389	1.81266	1.59652	0.622351	0.965784	0.383645		18	0.966572	0.488422	0.12611
1.01582	0.623678	1.03641	0.992878	1.27508	1.07232	1.15087	0.651825	1.20755	1.42996	0.663239	1.55847	0.749286	0.634181	0.882085		20	0.996243	0.296617	0.0765862
0.928473	1.19835	0.950817	1.00795	0.505907	0.806815	1.28117	1.1094	0.782998	0.969063	0.935971	1.26518	0.617271	0.520457	0.901075		22	0.918727	0.243344	0.0628312
0.634053	0.927721	0.814178	0.747502	1.24996	1.08336	0.694125	0.889319	0.625048	0.498588	1.49158	-0.36985	0.823134	0.573004	0.652222		24	0.755596	0.410693	0.106041
0.879034	0.997479	0.692785	0.911763	1.09755	1.24245	1.15399	0.802104	1.07738	0.506165	1.02909	1.95496	1.29651	0.875517	0.681193		26	1.0132	0.339441	0.0876432
0.817317	0.735952	0.96736	0.850059	1.07436	0.92658	1.14369	0.345045	1.12009	0.9479	1.20623	1.44153	1.25628	0.517182	0.812187		28	0.944117	0.283979	0.0733229
0.829031	1.13437	0.544762	0.984412	1.63231	0.87114	1.10659	0.76759	1.04457	1.67565	1.706	1.78899	0.714262	0.512193	1.18376		30	1.09971	0.424285	0.10955
0.886586	0.94133	0.641457	0.940068	0.820729	1.11434	1.14838	0.451546	0.526269	0.91841	1.09124	1.41312	0.919452	0.44985	1.38515		32	0.909862	0.300259	0.0775264
1.31204	0.74923	0.99371	0.731975	0.919834	0.888384	1.17615	0.791277	0.931846	0.443636	0.304444	1.20577	0.797364	0.483774	0.982755		34	0.847479	0.283454	0.0731875
1.29827	0.672289	0.465615	0.967499	1.24702	0.80574	1.02212	1.23157	0.516587	1.39543	1.59018	1.51586	0.615833	0.692805	0.35783		36	0.959642	0.40269	0.103974
1.08713	0.757527	0.990264	0.959894	1.24683	0.516718	1.23378	0.563761	0.673344	1.25747	0.788363	1.6172	1.19548	0.794568	0.611061		38	0.952892	0.316753	0.0817852
0.76355	0.988104	1.37774	1.14769	0.71442	1.18016	0.870082	0.911194	1.32881	1.67627	2.30726	1.25739	0.3913	0.682948	0.815982		40	1.09419	0.468416	0.120944
0.585589	0.939502	0.99962	0.890212	1.81347	0.662541	1.40169	1.23786	1.02391	1.0994	1.65619	1.93597	0.831785	0.937523	1.34879		42	1.1576	0.403498	0.104183
0.62156	0.965385	0.999084	0.992143	0.998908	0.757682	1.27222	1.14119	1.26365	0.334134	0.576671	0.552502	0.772154	0.878789	0.836943		44	0.864201	0.268083	0.0692188
0.854142	0.811886	0.80632	1.00962	1.34986	1.69978	0.676718	0.43821	1.24579	0.881111	0.16392	1.47962	0.461181	1.06367	1.75633		46	0.979877	0.462171	0.119332
0.968709	0.816959	0.733507	0.89647	0.636886	1.04389	1.18102	0.977398	1.10003	1.2107	1.77684	1.30833	1.06726	0.823474	0.019778		48	0.97075	0.379841	0.0980746
0.924533	1.19927	0.841693	0.775746	1.33578	1.03769	1.55278	0.794078	1.13958	0.821406	1.29002	1.01091	0.546475	0.644969	1.10857		50	1.00157	0.275419	0.0711129
1.04913	0.946902	0.912879	0.974802	1.39582	0.933451	1.50845	0.73122	1.1765	1.21528	1.81077	1.24543	1.77513	0.799946	0.980337		52	1.16374	0.331608	0.0856207
0.561788	0.47543	1.26925	0.974884	0.932983	1.07781	1.05974	1.44207	0.632456	0.819931	0.325079	1.94941	1.03695	0.734893	0.867461		54	0.944008	0.40677	0.105028
1.0981	0.857939	1.34273	1.10501	0.773763	0.439152	1.00204	0.941192	1.05579	1.096	0.973923	1.63528	1.25417	0.891857	0.568886		56	1.00239	0.29352	0.0757864
0.931275	0.734563	1.22549	0.948827	1.07965	0.96616	1.33304	0.405873	1.25318	1.11428	0.813844	1.38812	0.367669	0.650622	0.590467		58	0.920204	0.322556	0.0832837

## Sheet: CCK4 rescue
	CS-after	CCK-4-base	VEH-base	CCK-4-test	VEH-test		CS-before	CCK-4-base	VEH-base	CCK-4-test	VEH-test
		0.170833	0.144444	0.6125	0.308333			0.0583333	0.0722222	0.179167	0.195833
		0.163889	0.08125	0.4	0.2			0.025	0.0458333	0.125	0.225
		0.0333333	0.0388889	0.466667	0.345833			0.0125	0.0305556	0.2	0.15
		0.141667	0.0722222	0.3875	0.195833			0.0375	0.0611111	0.15	0.00416667
		0.0111111	0.025	0.733333	0.295833			0.0222222	0.00833333	0.329167	0.279167
		0.102778	0.0625	0.658333	0.45			0.138889	0.1125	0.0666667	0.183333
			0.0638889		0.329167				0.0416667		0.025
	CS-after						CS-before
	anova	treatment	baseline	test			anova	treatment	baseline	test
		CCK-4	0.170833	0.6125				CCK-4	0.0583333	0.179167
		CCK-4	0.163889	0.4				CCK-4	0.025	0.125
		CCK-4	0.0333333	0.466667				CCK-4	0.0125	0.2
		CCK-4	0.141667	0.3875				CCK-4	0.0375	0.15
		CCK-4	0.0111111	0.733333				CCK-4	0.0222222	0.329167
		CCK-4	0.102778	0.658333				CCK-4	0.138889	0.0666667
		VEH	0.144444	0.308333				VEH	0.0722222	0.195833
		VEH	0.08125	0.2				VEH	0.0458333	0.225
		VEH	0.0388889	0.345833				VEH	0.0305556	0.15
		VEH	0.0722222	0.195833				VEH	0.0611111	0.00416667
		VEH	0.025	0.295833				VEH	0.00833333	0.279167
		VEH	0.0625	0.45				VEH	0.1125	0.183333
		VEH	0.0638889	0.329167				VEH	0.0416667	0.025
