# Supplementary material for: The entorhinal cortex modulates trace fear memory formation and neuroplasticity in the mouse lateral amygdala via cholecystokinin
Source: eLife. 2021 Nov 15;10:e69333. doi: 10.7554/eLife.69333 (PMC8629425; doi:10.7554/eLife.69333)
Supplement: Figure 3—source data 1. [file elife-69333-fig3-data1.xlsx]

## Sheet: summary
	M2020091501#						M2020091503#
	Slice	Scope	GAD ratio				Slice	No. Scope	EYFP	Double	CamKII Ratio
	1	1	0				1	3	52	47	0.903846
	2	1	0				2	4	50	44	0.88
	M2020091502#						M2020091504#
			GAD+ EYFP+ / EYFP+				slice	No. Scope	EYFP	Double	CamKII Ratio
	Slice	No. Scope	GAD ratio				1	2	55	44	0.8
	1	3	0.0125				2	2	23	15	0.652174
	2	3	0.0114286
	M2020041702#						F:\Histology\Confocal\20200722\IHC20200711_CamKII\M2020041702#_RetroGcamp_CamKII594\
	Slice	No. Scope	GAD ratio				3D Montage of 2_scope1_63x_egfp_camkii594-z14
	1	4	0.0116279
									EYFP	CamKII	CamKII Ratio
	M2020041703#								6	5	0.833333
	Slice	No. Scope	GAD Ratio				Only this scope has fair CamKII staining, exlcude other images from statistics
	1	4	0
			GAD Ratio	CamKII Ratio
			0	0.903846
			0	0.88
			0.0125	0.8
			0.0114286	0.652174
			0.0116279	0.833333
			0

## Sheet: M2020091501#
	CamKII is not good
				EYFP+	GAD+	Double+
	Slice	Scope	Slice	Type 1	Type 2	Type 3	Type 4	Type 5	Type 6	Type 7	Type 8		C-pos	Z-pos	T-pos
	1	1	1	0	12	0	0	0	0	0	0	1	1	1
			2	0	0	0	0	0	0	0	0	2	1	1
			3	10	0	0	0	0	0	0	0	3	1	1
																						M2020091501#
			Total	10	12	0	0	0	0	0	0											Slice	Scope	GAD+ EYFP+ / EYFP+
																						1	1	0
			GAD+ EYFP+ / EYFP+		0																	2	1	0
				EYFP+	GAD+	Double+
	Slice	Scope	Slice	Type 1	Type 2	Type 3	Type 4	Type 5	Type 6	Type 7	Type 8		C-pos	Z-pos	T-pos
	2	1	1	17	0	0	0	0	0	0	0	1	1	1
			2	0	10	0	0	0	0	0	0	2	1	1
			3	0	0	0	0	0	0	0	0	3	1	1
			Total	17	10	0	0	0	0	0	0
			GAD+ EYFP+ / EYFP+		0

## Sheet: M2020091502#
		CamKII not good
			EYFP+	GAD+	Double+
Slice	Scope	Slice	Type 1	Type 2	Type 3	Type 4	Type 5	Type 6	Type 7	Type 8		C-pos	Z-pos	T-pos
1	1	1	0	0	0	0	0	0	0	0	1	1	1
		2	81	0	0	0	0	0	0	0	2	1	1
		3	1	25	0	0	0	0	0	0	3	1	1
		Total	82	25	0	0	0	0	0	0
		GAD+EYFP+/EYFP+		0
			EYFP+		GAD+		GAD/EYFP
Slice	Scope	Slice	Type 1	Type 2	Type 3	Type 4	Type 5	Type 6	Type 7	Type 8		C-pos	Z-pos	T-pos
1	2	1	1	0	0	0	2	0	0	0	1	1	1
		2	0	0	37	0	0	0	0	0	2	1	1
		3	100	0	0	0	0	0	0	0	3	1	1
		Total	101	40	37	22	2	0	0	0
		GAD+EYFP+/EYFP+		0.019802
			EYFP+		GAD	GAD/EYFP
Slice	Scope	Slice	Type 1	Type 2	Type 3	Type 4	Type 5	Type 6	Type 7	Type 8		C-pos	Z-pos	T-pos
1	3	1	57	0	0	0	0	0	0	0	1	1	1
		2	0	0	14	1	0	0	0	0	2	1	1
		3	0	0	0	0	0	0	0	0	3	1	1
		Total	57	18	14	1	0	0	0	0
		GAD+EYFP+/EYFP+		0.0175439
Slice	Total	Double	EYFP+	Ratio
1		3	240	0.0125
			EYFP+		GAD	GAD/EYFP
Slice	Scope	Slice	Type 1	Type 2	Type 3	Type 4	Type 5	Type 6	Type 7	Type 8		C-pos	Z-pos	T-pos
2	1	1	0	0	0	0	0	0	0	0	1	1	1
		2	0	0	34	2	0	0	0	0	2	1	1
		3	34	0	0	0	0	0	0	0	3	1	1
		Total	34	11	34	2	0	0	0	0
		GAD+EYFP+/EYFP+		0.0588235
			EYFP+		GAD	GAD/EYFP
Slice	Scope	Slice	Type 1	Type 2	Type 3	Type 4	Type 5	Type 6	Type 7	Type 8		C-pos	Z-pos	T-pos
2	2	1	106	0	0	0	0	0	0	0	1	1	1
		2	0	0	36	0	0	0	0	0	2	1	1
		3	0	0	0	0	0	0	0	0	3	1	1
		Total	106	15	36	0	0	0	0	0
		GAD+EYFP+/EYFP+		0
			EYFP+		GAD	GAD/EYFP
Slice	Scope	Slice	Type 1	Type 2	Type 3	Type 4	Type 5	Type 6	Type 7	Type 8		C-pos	Z-pos	T-pos
2	3	1	0	0	0	0	0	0	0	0	1	1	1
		2	0	0	34	0	0	0	0	0	2	1	1
		3	35	0	0	0	0	0	0	0	3	1	1
		Total	35	14	34	0	0	0	0	0
		GAD+EYFP+/EYFP+		0
Slice	Total	Double	EYFP	Ratio
2		2	175	0.0114286
		Slice	No. Scope	GAD ratio
		1	3	0.0125
		2	3	0.0114286

## Sheet: M2020091503#
			EYFP+	CamKII+	Double+														Cropped	200 x 200 microns
Slice	Scope	Slice	Type 1	Type 2	Type 3	Type 4	Type 5	Type 6	Type 7	Type 8		C-pos	Z-pos	T-pos					Slice	Type 1	Type 2	Type 3	Type 4	Type 5	Type 6	Type 7	Type 8		C-pos	Z-pos	T-pos
1	1	1	16	0	9	0	0	0	0	0	1	1	1						1	0	0	0	0	0	0	0	0	1	1	1
		2	0	107	2	0	0	0	0	0	2	1	1						2	10	9	0	0	0	0	0	0	2	1	1
		Total	16	107	11	0	0	0	0	0									Total	10	9	0	0	0	0	0	0
		CamKII+ EYFP+ / EYFP+		0.6875																eyfp	double
																			double/eyfp		0.9											M2020091503#
																																Slice	Scope	CamKII+ EYFP+/EYFP+
																																1	1	0.6875
																																1	2	0.588235
																																1	3	0.576923
																			Cropped													2	1	0.590909
			EYFP+	CamKII+	Double+														Slice	Type 1	Type 2	Type 3	Type 4	Type 5	Type 6	Type 7	Type 8		C-pos	Z-pos	T-pos	2	2	0.678571
Slice	Scope	Slice	Type 1	Type 2	Type 3	Type 4	Type 5	Type 6	Type 7	Type 8		C-pos	Z-pos	T-pos					1	16	16	0	0	0	0	0	0	1	1	1		2	3	0.342857
1	2	1	0	101	20	0	0	0	0	0	1	1	1						2	0	0	0	0	0	0	0	0	2	1	1		2	4	0.283333
		2	34	0	0	0	0	0	0	0	2	1	1
																			Total	16	16	0	0	0	0	0	0
		Total	34	101	20	0	0	0	0	0										eyfp	double
		CamKII+ EYFP+ / EYFP+		0.588235															double/eyfp		1
			EYFP+	CamKII+	Double+														Cropped
slice	scope	Slice	Type 1	Type 2	Type 3	Type 4	Type 5	Type 6	Type 7	Type 8		C-pos	Z-pos	T-pos					Slice	Type 1	Type 2	Type 3	Type 4	Type 5		C-pos	Z-pos	T-pos
1	3	1	52	0	0	0	0	0	0	0	1	1	1						1	0	0	0	0	0	1	1	1
		2	0	126	30	0	0	0	0	0	2	1	1						2	26	22	0	0	0	2	1	1
		Total	52	126	30	0	0	0	0	0									Total	26	22	0	0	0
		CamKII+ EYFP+ / EYFP+		0.576923
																			double/eyfp		0.846154
																			Slice	No. Scope	EYFP	Double		CamKII Ratio
																			1	3	52	47		0.903846
			EYFP+	CamKII+	Double+
slice	scope	Slice	Type 1	Type 2	Type 3	Type 4	Type 5	Type 6	Type 7	Type 8		C-pos	Z-pos	T-pos					Cropped
2	1	1	0	107	13	0	0	0	0	0	1	1	1						Slice	Type 1	Type 2	Type 3	Type 4	Type 5		C-pos	Z-pos	T-pos
		2	22	0	0	0	0	0	0	0	2	1	1						1	0	0	0	0	0	1	1	1
																			2	9	8	0	0	0	2	1	1
		Total	22	107	13	0	0	0	0	0
		CamKII+ EYFP+ / EYFP+		0.590909															Total	9	8	0	0	0
																			double/eyfp		0.888889
																			Cropped
			EYFP+	CamKII+	Double+														Slice	Type 1	Type 2	Type 3	Type 4	Type 5		C-pos	Z-pos	T-pos
slice	scope	Slice	Type 1	Type 2	Type 3	Type 4	Type 5	Type 6	Type 7	Type 8		C-pos	Z-pos	T-pos					1	10	9	0	0	0	1	1	1
2	2	1	28	0	0	0	0	0	0	0	1	1	1						2	0	0	0	0	0	2	1	1
		2	0	154	19	0	0	0	0	0	2	1	1
																			Total	10	9	0	0	0
		Total	28	154	19	0	0	0	0	0
		CamKII+ EYFP+ / EYFP+		0.678571															double/eyfp		0.9
			EYFP+	CamKII+	Double+														Crop2
slice	scope	Slice	Type 1	Type 2	Type 3	Type 4	Type 5	Type 6	Type 7	Type 8		C-pos	Z-pos	T-pos					Slice	Type 1	Type 2	Type 3	Type 4	Type 5		C-pos	Z-pos	T-pos
2	3	1	35	0	3	0	0	0	0	0	1	1	1						1	13	11	0	0	0	1	1	1
		2	0	88	9	0	0	0	0	0	2	1	1						2	0	0	0	0	0	2	1	1
		Total	35	88	12	0	0	0	0	0									Total	13	11	0	0	0
		CamKII+ EYFP+ / EYFP+		0.342857
																			double/eyfp		0.846154
			EYFP+	CamKII+	Double+
slice	scope	Slice	Type 1	Type 2	Type 3	Type 4	Type 5	Type 6	Type 7	Type 8		C-pos	Z-pos	T-pos					Crop2
2	4	1	60	0	0	0	0	0	0	0	1	1	1						Slice	Type 1	Type 2	Type 3	Type 4	Type 5		C-pos	Z-pos	T-pos
		2	0	78	17	0	0	0	0	0	2	1	1						1	18	16	0	0	0	1	1	1
																			2	0	0	0	0	0	2	1	1
		Total	60	78	17	0	0	0	0	0
		CamKII+ EYFP+ / EYFP+		0.283333															Total	18	16	0	0	0
																			double/eyfp		0.888889
																			slice	No. Scope	EYFP	Double	CamKII Ratio
																			2	4	50	44	0.88

## Sheet: M2020091504#
			CamKII+	EYFP+	Double+														Crop
Slice	Scope	Slice	Type 1	Type 2	Type 3	Type 4	Type 5	Type 6	Type 7	Type 8		C-pos	Z-pos	T-pos					Slice	Type 1	Type 2	Type 3	Type 4	Type 5		C-pos	Z-pos	T-pos
1	1	1	0	104	0	0	0	0	0	0	1	1	1						1	0	0	0	0	0	1	1	1
		2	44	0	25	0	0	0	0	0	2	1	1						2	37	27	0	0	0	2	1	1
		Total	44	104	25	0	0	0	0	0									Total	37	27	0	0	0															M2020091504#
		CamKII+ EYFP+/ EYFP+			0.240385																																		Slice	Scope	CamKII+ EYFP+/ EYFP+
																			double/eyfp		0.72973																		1	1	0.240385
																																							1	2	0.684211
																																							2	1	0.0877193
																																							2	2	0.235294
			EYFP+	CamKII+	Double+														Crop
Slice	Scope	Slice	Type 1	Type 2	Type 3	Type 4	Type 5	Type 6	Type 7	Type 8		C-pos	Z-pos	T-pos					Slice	Type 1	Type 2	Type 3	Type 4	Type 5		C-pos	Z-pos	T-pos
1	2	Total	38	94	26	0	0	0	0	0									1	18	17	0	0	0	1	1	1
		CamKII+ EYFP+/ EYFP+			0.684211														2	0	0	0	0	0	2	1	1
																			Total	18	17	0	0	0
																			double/eyfp		0.944444
																			slice	No. Scope	EYFP	Double	CamKII Ratio
																			1	2	55	44	0.8
			EYFP+	CamKII+	Double+														crop
Slice	Scope	Slice	Type 1	Type 2	Type 3	Type 4	Type 5	Type 6	Type 7	Type 8		C-pos	Z-pos	T-pos					Slice	Type 1	Type 2	Type 3	Type 4	Type 5		C-pos	Z-pos	T-pos
2	1	1	0	24	0	0	0	0	0	0	1	1	1						1	15	9	0	0	0	1	1	1
		2	57	0	5	0	0	0	0	0	2	1	1						2	0	0	0	0	0	2	1	1
		Total	57	24	5	0	0	0	0	0									Total	15	9	0	0	0
		CamKII+ EYFP+/ EYFP+			0.0877193
																			double/eyfp		0.6
			CamKII	EYFP	Double														Crop
Slice	Scope	Slice	Type 1	Type 2	Type 3	Type 4	Type 5	Type 6	Type 7	Type 8		C-pos	Z-pos	T-pos
2	2	1	0	17	1	0	0	0	0	0	1	1	1						Slice	Type 1	Type 2	Type 3	Type 4	Type 5		C-pos	Z-pos	T-pos
		2	0	0	0	0	0	0	0	0	2	1	1						1	8	6	0	0	0	1	1	1
		3	40	0	3	0	0	0	0	0	3	1	1						2	0	0	0	0	0	2	1	1
		Total	40	17	4	0	0	0	0	0									Total	8	6	0	0	0
		CamKII+ EYFP+/ EYFP+			0.235294
																			double/eyfp		0.75
																			slice	No.Scope	EYFP	Double	CamKII Ratio
																			2	2	23	15	0.652174

## Sheet: M2020041702#GAD
Batch	Subject	Description	Scope	Slice	Type 1	Type 2	Type 3		C-pos	Z-pos	T-pos		Type3/Type2
IHC20200716	M2020041702#	RetroGcamp/GAD647	1	1	0	4	0	1	1	1
				2	0	0	0	2	1	1
		Type1 GAD67+		3	1	2	0	1	2	1
		Type2 RetroGcamp+		4	0	0	0	2	2	1
		Type3 Overlay+		5	0	1	1	1	3	1
				6	0	0	0	2	3	1
				7	0	1	0	1	4	1
				8	0	0	0	2	4	1
				9	0	2	0	1	5	1
				10	1	0	0	2	5	1
				11	0	3	0	1	6	1
				12	0	0	0	2	6	1
				13	0	0	0	1	7	1
				14	0	0	0	2	7	1
				15	0	0	0	1	8	1
				16	0	0	0	2	8	1
				17	0	1	0	1	9	1
				18	0	0	0	2	9	1
				19	0	0	0	1	10	1
				20	0	0	0	2	10	1
				21	0	1	0	1	11	1
				22	0	0	0	2	11	1
				23	0	2	0	1	12	1
				24	0	0	0	2	12	1
				Total	2	17	1						0.0588235
			Scope	Slice	Type 1	Type 2	Type 3		C-pos	Z-pos	T-pos
			2	1	0	0	0	1	1	1
				2	0	0	0	2	1	1
				3	0	0	0	3	1	1
				4	0	0	0	1	2	1
				5	0	0	0	2	2	1
				6	0	10	0	3	2	1
				7	0	0	0	1	3	1
				8	0	0	0	2	3	1
				9	1	2	0	3	3	1
				10	0	0	0	1	4	1
				11	0	0	0	2	4	1
				12	0	1	0	3	4	1
				13	0	0	0	1	5	1
				14	0	0	0	2	5	1
				15	0	1	0	3	5	1
				16	0	0	0	1	6	1
				17	0	0	0	2	6	1
				18	0	0	0	3	6	1
				19	0	0	0	1	7	1
				20	0	0	0	2	7	1
				21	0	2	0	3	7	1
				22	0	0	0	1	8	1
				23	0	0	0	2	8	1
				24	0	4	0	3	8	1
				25	0	0	0	1	9	1
				26	0	0	0	2	9	1
				27	0	2	0	3	9	1
				28	0	0	0	1	10	1
				29	0	0	0	2	10	1
				30	0	0	0	3	10	1
				31	0	0	0	1	11	1
				32	0	0	0	2	11	1
				33	0	2	0	3	11	1
				34	0	0	0	1	12	1
				35	0	0	0	2	12	1
				36	0	1	0	3	12	1
				37	0	0	0	1	13	1
				38	0	0	0	2	13	1
				39	1	2	0	3	13	1
				Total	2	27	0						0
			Scope	Slice	Type 1	Type 2	Type 3		C-pos	Z-pos	T-pos
			3	1	0	14	0	1	1	1
				2	0	0	0	2	1	1
				3	0	0	0	3	1	1
				4	0	0	0	1	2	1
				5	0	0	0	2	2	1
				6	0	0	0	3	2	1
				7	0	0	0	1	3	1
				8	0	0	0	2	3	1
				9	0	0	0	3	3	1
				10	1	2	0	1	4	1
				11	0	0	0	2	4	1
				12	0	0	0	3	4	1
				13	0	0	0	1	5	1
				14	0	0	0	2	5	1
				15	0	0	0	3	5	1
				16	0	0	0	1	6	1
				17	0	0	0	2	6	1
				18	0	0	0	3	6	1
				19	0	2	0	1	7	1
				20	0	0	0	2	7	1
				21	0	0	0	3	7	1
				22	0	3	0	1	8	1
				23	0	0	0	2	8	1
				24	0	0	0	3	8	1
				25	1	0	0	1	9	1
				26	0	0	0	2	9	1
				27	0	0	0	3	9	1
				28	0	1	0	1	10	1
				29	0	0	0	2	10	1
				30	0	0	0	3	10	1
				31	0	0	0	1	11	1
				32	0	0	0	2	11	1
				33	0	0	0	3	11	1
				34	1	1	0	1	12	1
				35	0	0	0	2	12	1
				36	0	0	0	3	12	1
				37	1	3	0	1	13	1
				38	0	0	0	2	13	1
				39	0	0	0	3	13	1
				Total	4	26	0						0
			Scope	Slice	Type 1	Type 2	Type 3		C-pos	Z-pos	T-pos
			4	1	1	0	0	1	1	1
				2	0	0	0	2	1	1
				3	0	0	0	3	1	1
				4	0	7	0	1	2	1
				5	0	0	0	2	2	1
				6	0	0	0	3	2	1
				7	1	0	0	1	3	1
				8	0	0	0	2	3	1
				9	0	0	0	3	3	1
				10	0	1	0	1	4	1
				11	0	0	0	2	4	1
				12	0	0	0	3	4	1
				13	0	0	0	1	5	1
				14	0	0	0	2	5	1
				15	0	0	0	3	5	1
				16	0	1	0	1	6	1
				17	0	0	0	2	6	1
				18	0	0	0	3	6	1
				19	0	1	0	1	7	1
				20	0	0	0	2	7	1
				21	0	0	0	3	7	1
				22	0	3	0	1	8	1
				23	0	0	0	2	8	1
				24	0	0	0	3	8	1
				25	1	1	0	1	9	1
				26	0	0	0	2	9	1
				27	0	0	0	3	9	1
				28	0	0	0	1	10	1
				29	0	0	0	2	10	1
				30	0	0	0	3	10	1
				31	0	1	0	1	11	1
				32	0	0	0	2	11	1
				33	0	0	0	3	11	1
				34	0	1	0	1	12	1
				35	0	0	0	2	12	1
				36	0	0	0	3	12	1
				37	0	0	0	1	13	1
				38	0	0	0	2	13	1
				39	0	0	0	3	13	1
				Total	3	16	0						0
					GAD	RetroGcamp	Double		Ratio
			total		11	86	1		0.0116279

## Sheet: M2020041703#GAD
Batch	Subject	Description	Scope	Slice	Type 1	Type 2	Type 3	Type 4	Type 5	Type 6	Type 7	Type 8		C-pos	Z-pos	T-pos	Type3/Type2
IHC20200716	M2020041702#	RetroGcamp/GAD647	1	1	1	0	0	0	0	0	0	0	1	1	1
				2	0	2	0	0	0	0	0	0	2	1	1
		Type1 GAD67+		3	0	0	0	0	0	0	0	0	1	2	1
		Type2 RetroGcamp+		4	0	0	0	0	0	0	0	0	2	2	1
		Type3 Overlay+		5	0	0	0	0	0	0	0	0	1	3	1
				6	0	1	0	0	0	0	0	0	2	3	1
				7	0	0	0	0	0	0	0	0	1	4	1
				8	0	0	0	0	0	0	0	0	2	4	1
				9	0	0	0	0	0	0	0	0	1	5	1
				10	0	0	0	0	0	0	0	0	2	5	1
				11	0	0	0	0	0	0	0	0	1	6	1
				12	0	0	0	0	0	0	0	0	2	6	1
				13	2	0	0	0	0	0	0	0	1	7	1
				14	0	1	0	0	0	0	0	0	2	7	1
				15	0	0	0	0	0	0	0	0	1	8	1
				16	0	0	0	0	0	0	0	0	2	8	1
				17	1	0	0	0	0	0	0	0	1	9	1
				18	0	0	0	0	0	0	0	0	2	9	1
				19	0	0	0	0	0	0	0	0	1	10	1
				20	0	1	0	0	0	0	0	0	2	10	1
				21	0	0	0	0	0	0	0	0	1	11	1
				22	0	0	0	0	0	0	0	0	2	11	1
				23	0	0	0	0	0	0	0	0	1	12	1
				24	0	0	0	0	0	0	0	0	2	12	1
				25	0	0	0	0	0	0	0	0	1	13	1
				26	0	0	0	0	0	0	0	0	2	13	1
				27	0	0	0	0	0	0	0	0	1	14	1
				28	0	0	0	0	0	0	0	0	2	14	1
				29	1	0	0	0	0	0	0	0	1	15	1
				30	0	0	0	0	0	0	0	0	2	15	1
				31	0	0	0	0	0	0	0	0	1	16	1
				32	0	0	0	0	0	0	0	0	2	16	1
				Total	5	5	0	0	0	0	0	0					0
			Scope	Slice	Type 1	Type 2	Type 3	Type 4	Type 5	Type 6	Type 7	Type 8		C-pos	Z-pos	T-pos
			2	1	0	0	0	0	0	0	0	0	1	1	1
				2	0	3	0	0	0	0	0	0	2	1	1
				3	0	0	0	0	0	0	0	0	1	2	1
				4	0	1	0	0	0	0	0	0	2	2	1
				5	0	0	0	0	0	0	0	0	1	3	1
				6	0	2	0	0	0	0	0	0	2	3	1
				7	0	0	0	0	0	0	0	0	1	4	1
				8	0	2	0	0	0	0	0	0	2	4	1
				9	0	0	0	0	0	0	0	0	1	5	1
				10	0	0	0	0	0	0	0	0	2	5	1
				11	1	0	0	0	0	0	0	0	1	6	1
				12	0	0	0	0	0	0	0	0	2	6	1
				13	0	0	0	0	0	0	0	0	1	7	1
				14	0	0	0	0	0	0	0	0	2	7	1
				15	0	0	0	0	0	0	0	0	1	8	1
				16	0	0	0	0	0	0	0	0	2	8	1
				17	0	0	0	0	0	0	0	0	1	9	1
				18	0	2	0	0	0	0	0	0	2	9	1
				19	2	0	0	0	0	0	0	0	1	10	1
				20	0	0	0	0	0	0	0	0	2	10	1
				21	0	0	0	0	0	0	0	0	1	11	1
				22	0	1	0	0	0	0	0	0	2	11	1
				23	0	0	0	0	0	0	0	0	1	12	1
				24	0	0	0	0	0	0	0	0	2	12	1
				25	0	0	0	0	0	0	0	0	1	13	1
				26	0	0	0	0	0	0	0	0	2	13	1
				27	0	0	0	0	0	0	0	0	1	14	1
				28	0	1	0	0	0	0	0	0	2	14	1
				29	1	0	0	0	0	0	0	0	1	15	1
				30	0	0	0	0	0	0	0	0	2	15	1
				31	0	0	0	0	0	0	0	0	1	16	1
				32	0	0	0	0	0	0	0	0	2	16	1
				Total	4	12	0	0	0	0	0	0					0
			Scope	Slice	Type 1	Type 2	Type 3	Type 4	Type 5	Type 6	Type 7	Type 8		C-pos	Z-pos	T-pos
			3	1	2	0	0	0	0	0	0	0	1	1	1
				2	0	2	0	0	0	0	0	0	2	1	1
				3	0	0	0	0	0	0	0	0	1	2	1
				4	0	0	0	0	0	0	0	0	2	2	1
				5	1	0	0	0	0	0	0	0	1	3	1
				6	0	1	0	0	0	0	0	0	2	3	1
				7	1	0	0	0	0	0	0	0	1	4	1
				8	0	0	0	0	0	0	0	0	2	4	1
				9	0	0	0	0	0	0	0	0	1	5	1
				10	0	1	0	0	0	0	0	0	2	5	1
				11	0	0	0	0	0	0	0	0	1	6	1
				12	0	1	0	0	0	0	0	0	2	6	1
				13	1	0	0	0	0	0	0	0	1	7	1
				14	0	2	0	0	0	0	0	0	2	7	1
				15	0	0	0	0	0	0	0	0	1	8	1
				16	0	1	0	0	0	0	0	0	2	8	1
				17	1	0	0	0	0	0	0	0	1	9	1
				18	0	0	0	0	0	0	0	0	2	9	1
				19	0	0	0	0	0	0	0	0	1	10	1
				20	0	0	0	0	0	0	0	0	2	10	1
				21	1	0	0	0	0	0	0	0	1	11	1
				22	0	2	0	0	0	0	0	0	2	11	1
				23	0	0	0	0	0	0	0	0	1	12	1
				24	0	0	0	0	0	0	0	0	2	12	1
				25	0	0	0	0	0	0	0	0	1	13	1
				26	0	1	0	0	0	0	0	0	2	13	1
				27	1	0	0	0	0	0	0	0	1	14	1
				28	0	2	0	0	0	0	0	0	2	14	1
				Total	8	13	0	0	0	0	0	0					0
			scope	Slice	Type 1	Type 2	Type 3	Type 4	Type 5	Type 6	Type 7	Type 8		C-pos	Z-pos	T-pos
			4	1	0	0	0	0	0	0	0	0	1	1	1
				2	0	7	0	0	0	0	0	0	2	1	1
				3	0	0	0	0	0	0	0	0	1	2	1
				4	0	0	0	0	0	0	0	0	2	2	1
				5	0	0	0	0	0	0	0	0	1	3	1
				6	0	0	0	0	0	0	0	0	2	3	1
				7	0	0	0	0	0	0	0	0	1	4	1
				8	0	1	0	0	0	0	0	0	2	4	1
				9	0	0	0	0	0	0	0	0	1	5	1
				10	0	1	0	0	0	0	0	0	2	5	1
				11	0	0	0	0	0	0	0	0	1	6	1
				12	0	3	0	0	0	0	0	0	2	6	1
				13	1	0	0	0	0	0	0	0	1	7	1
				14	0	0	0	0	0	0	0	0	2	7	1
				15	0	0	0	0	0	0	0	0	1	8	1
				16	0	0	0	0	0	0	0	0	2	8	1
				17	0	0	0	0	0	0	0	0	1	9	1
				18	0	2	0	0	0	0	0	0	2	9	1
				19	2	0	0	0	0	0	0	0	1	10	1
				20	0	0	0	0	0	0	0	0	2	10	1
				21	1	0	0	0	0	0	0	0	1	11	1
				22	0	2	0	0	0	0	0	0	2	11	1
				23	0	0	0	0	0	0	0	0	1	12	1
				24	0	0	0	0	0	0	0	0	2	12	1
				Total	4	16	0	0	0	0	0	0					0
					GAD	RetroGcamp	Double+		GAD ratio
			Total		21	46	0		0
