# Supplementary material for: The entorhinal cortex modulates trace fear memory formation and neuroplasticity in the mouse lateral amygdala via cholecystokinin
Source: eLife. 2021 Nov 15;10:e69333. doi: 10.7554/eLife.69333 (PMC8629425; doi:10.7554/eLife.69333)
Supplement: Figure 4—source data 1. [file elife-69333-fig4-data1.xlsx]

## Sheet: hM4di in EC
	CS-after	EGFP-base	hM4Di-base	EGFP-test	hM4Di-test			CS-before	EGFP-base	hM4Di-base	EGFP-test	hM4Di-test
		0.0527778	0.0833333	0.166667	0.466667				0.0444444	0.0305556	0.0833333	0.0333333
		0.275	0.172222	0.633333	0.175				0.108333	0.15	0.3	0.141667
		0.102778	0.266667	0.752381	0.525				0.0944444	0.075	0.2	0.141667
		0.0833333	0.0638889	0.952381	0.341667				0.0194444	0.0833333	0.238095	0.308333
		0.105556	0.0388889	0.908333	0.32381				0.1	0.0972222	0.1	0.32381
		0.0416667	0.194444	0.780952	0.281818				0.0583333	0.00277778	0.00952381	0
		0.180556	0.227778	0.575	0.609524				0.025	0.125	0.191667	0.2
	anova	group	baseline	test				anova	group	baseline	test
		EGFP	0.0527778	0.166667					EGFP	0.0444444	0.0833333
		EGFP	0.275	0.633333					EGFP	0.108333	0.3
		EGFP	0.102778	0.752381					EGFP	0.0944444	0.2
		EGFP	0.0833333	0.952381					EGFP	0.0194444	0.238095
		EGFP	0.105556	0.908333					EGFP	0.1	0.1
		EGFP	0.0416667	0.780952					EGFP	0.0583333	0.00952381
		EGFP	0.180556	0.575					EGFP	0.025	0.191667
		hM4di	0.0833333	0.466667					hM4di	0.0305556	0.0333333
		hM4di	0.172222	0.175					hM4di	0.15	0.141667
		hM4di	0.266667	0.525					hM4di	0.075	0.141667
		hM4di	0.0638889	0.341667					hM4di	0.0833333	0.308333
		hM4di	0.0388889	0.32381					hM4di	0.0972222	0.32381
		hM4di	0.194444	0.281818					hM4di	0.00277778	0
		hM4di	0.227778	0.609524					hM4di	0.125	0.2

## Sheet: hM4di in EC-CCK neuron
	CS-after							CS-before
	origin plot	VEH-base	CLZ-base	VEH-test	CLZ-test			origin plot	VEH-base	CLZ-base	VEH-test	CLZ-test
		0.087963	0.133796	0.258333	0.229167				0.0796296	0.130556	0.259722	0.413889
		0.1375	0.0833333	0.651389	0.404167				0.0671296	0.0384259	0.405556	0.205556
		0.143056	0.24213	0.745833	0.15				0.116667	0.139815	0.165278	0.133333
		0.147685	0.0787037	0.201389	0.279167				0.104167	0.0398148	0.101389	0.0319444
		0.148611	0.0893519	0.313889	0.258333				0.151042	0.0587963	0.125	0.125
		0.0587963	0.200694	0.629167	0.480556				0.0740741	0.124306	0.319444	0.233333
		0.200694	0.180556	0.620833	0.166667				0.124306	0.0527778	0.151389	0.1125
		0.180556	0.0310606	0.134722	0.181944				0.0527778	0.0181818	0.0708333	0.173611
		0.0310606	0.152431	0.75	0.394444				0.0181818	0.151736	0.113889	0.1625
		0.152431	0.227778	0.534722	0.169444				0.151736	0.261111	0.113889	0.204167
	CS-after							CS-before
	anova	treatment						anova	treatment
		VEH	0.087963	0.258333					VEH	0.0796296	0.259722
		VEH	0.1375	0.651389					VEH	0.0671296	0.405556
		VEH	0.143056	0.745833					VEH	0.116667	0.165278
		VEH	0.147685	0.201389					VEH	0.104167	0.101389
		VEH	0.148611	0.313889					VEH	0.151042	0.125
		VEH	0.0587963	0.629167					VEH	0.0740741	0.319444
		VEH	0.200694	0.620833					VEH	0.124306	0.151389
		VEH	0.180556	0.134722					VEH	0.0527778	0.0708333
		VEH	0.0310606	0.75					VEH	0.0181818	0.113889
		VEH	0.152431	0.534722					VEH	0.151736	0.113889
		CLZ	0.133796	0.229167					CLZ	0.130556	0.413889
		CLZ	0.0833333	0.404167					CLZ	0.0384259	0.205556
		CLZ	0.24213	0.15					CLZ	0.139815	0.133333
		CLZ	0.0787037	0.279167					CLZ	0.0398148	0.0319444
		CLZ	0.0893519	0.258333					CLZ	0.0587963	0.125
		CLZ	0.200694	0.480556					CLZ	0.124306	0.233333
		CLZ	0.180556	0.166667					CLZ	0.0527778	0.1125
		CLZ	0.0310606	0.181944					CLZ	0.0181818	0.173611
		CLZ	0.152431	0.394444					CLZ	0.151736	0.1625
		CLZ	0.227778	0.169444					CLZ	0.261111	0.204167
