# Supplementary material for: The entorhinal cortex modulates trace fear memory formation and neuroplasticity in the mouse lateral amygdala via cholecystokinin
Source: eLife. 2021 Nov 15;10:e69333. doi: 10.7554/eLife.69333 (PMC8629425; doi:10.7554/eLife.69333)
Supplement: Figure 5—source data 1. [file elife-69333-fig5-data1.xlsx]

## Sheet: FAS _EGFP_DIO_mCherry
F:\Histology\Confocal\20201117\M2020050905#_FAS_EGFP_DIO_mCherry
			EC_scope1		EGFP	mCherry	Overlay
				Slice	Type 1	Type 2	Type 3	Type 4	Type 5	Type 6	Type 7		C-pos	Z-pos	T-pos
				1	0	33	4	0	0	0	0	1	1	1
				2	20	0	2	0	0	0	0	2	1	1
				3	0	0	0	0	0	0	0	3	1	1
				Total	20	33	6	0	0	0	0
			EC_scope2		EGFP	mCherry	Overlay
				Slice	Type 1	Type 2	Type 3	Type 4	Type 5	Type 6	Type 7		C-pos	Z-pos	T-pos
				1	0	45	0	0	0	0	0	1	1	1
				2	33	0	10	0	0	0	0	2	1	1
				3	0	0	1	0	0	0	0	3	1	1
				Total	33	45	11	0	0	0	0
			EC_scope3		EGFP	mCherry	Overlay
				Slice	Type 1	Type 2	Type 3	Type 4	Type 5	Type 6	Type 7		C-pos	Z-pos	T-pos
				1	21	0	0	0	0	0	0	1	1	1
				2	0	43	0	0	0	0	0	2	1	1
				3	0	0	10	0	0	0	0	3	1	1
				Total	21	43	10	0	0	0	0
F:\Histology\Confocal\20201117\M2020050906#_FAS_EGFP_DIO_mCherry
			EC_scope1		EGFP	mCherry	Overlay
				Slice	Type 1	Type 2	Type 3	Type 4	Type 5	Type 6	Type 7		C-pos	Z-pos	T-pos
				1	32	0	0	0	0	0	0	1	1	1
				2	0	22	0	0	0	0	0	2	1	1
				3	0	0	3	0	0	0	0	3	1	1
				Total	32	22	3	0	0	0	0
			EC_scope2		EGFP	mCherry	Overlay
				Slice	Type 1	Type 2	Type 3	Type 4	Type 5	Type 6	Type 7		C-pos	Z-pos	T-pos
				1	44	0	0	0	0	0	0	1	1	1
				2	0	21	0	0	0	0	0	2	1	1
				3	0	0	4	0	0	0	0	3	1	1
				Total	44	21	4	0	0	0	0
			EC_scope3		EGFP	mCherry	Overlay
				Slice	Type 1	Type 2	Type 3	Type 4	Type 5	Type 6	Type 7		C-pos	Z-pos	T-pos
				1	36	5	1	0	0	0	0	1	1	1
				2	0	0	0	0	0	0	0	2	1	1
				3	0	0	0	0	0	0	0	3	1	1
				Total	36	5	1	0	0	0	0
			EC_scope4		EGFP	mCherry	Overlay
				Slice	Type 1	Type 2	Type 3	Type 4	Type 5	Type 6	Type 7		C-pos	Z-pos	T-pos
				1	15	10	0	0	0	0	0	1	1	1
				2	0	0	0	0	0	0	0	2	1	1
				3	0	0	0	0	0	0	0	3	1	1
				Total	15	10	0	0	0	0	0
													Ratio
				Scope	EGFP	mCherry	Overlay		EGFP+	mCherry+	Double+		EGFP+	mCherry+	Double+
			050905#	1	20	33	6		14	27	6		0.297872	0.574468	0.12766
				2	33	45	11		22	34	11		0.328358	0.507463	0.164179
				3	21	43	10		11	33	10		0.203704	0.611111	0.185185
			050906#	1	32	22	3		29	19	3		0.568627	0.372549	0.0588235
				2	44	21	4		40	17	4		0.655738	0.278689	0.0655738
				3	36	5	1		35	4	1		0.875	0.1	0.025
				4	15	10	0		15	10	0		0.6	0.4	0
												avg	0.504186	0.406326	0.0894887
												std	0.237197	0.178767	0.0705606
												N	7	7	7
												sem	0.089652	0.0675675	0.0266694
												t-test	0.554811

## Sheet: DO_mCherry_DIO_EGFP
F:\Histology\Confocal\20201116\M2020050903#_CAG_DO_mCherry_DIO_EGFP
			EC_scope1		EGFP	mCherry	Overlay
				Slice	Type 1	Type 2	Type 3	Type 4	Type 5	Type 6	Type 7		C-pos	Z-pos	T-pos
				1	32	30	0	0	0	0	0	1	1	1
				2	0	0	0	0	0	0	0	2	1	1
				3	0	1	3	0	0	0	0	3	1	1
				Total	32	31	3	0	0	0	0
F:\Histology\Confocal\20201117\M2020050903#_CAG_DO_mCherry_DIO_EGFP
			EC_scope1		EGFP	mCherry	Overlay
				Slice	Type 1	Type 2	Type 3	Type 4	Type 5	Type 6	Type 7		C-pos	Z-pos	T-pos
				1	95	33	9	0	0	0	0	1	1	1
				2	0	0	0	0	0	0	0	2	1	1
				3	0	0	0	0	0	0	0	3	1	1
				Total	95	33	9	0	0	0	0
			EC_scope2		EGFP	mCherry	Overlay
				Slice	Type 1	Type 2	Type 3	Type 4	Type 5	Type 6	Type 7		C-pos	Z-pos	T-pos
				1	44	49	2	0	0	0	0	1	1	1
				2	0	0	0	0	0	0	0	2	1	1
				3	0	0	0	0	0	0	0	3	1	1
				Total	44	49	2	0	0	0	0
			EC_scope3		EGFP	mCherry	Overlay
				Slice	Type 1	Type 2	Type 3	Type 4	Type 5	Type 6	Type 7		C-pos	Z-pos	T-pos
				1	37	40	0	0	0	0	0	1	1	1
				2	0	0	0	0	0	0	0	2	1	1
				3	0	0	0	0	0	0	0	3	1	1
				Total	37	40	0	0	0	0	0
F:\Histology\Confocal\20201117\M2020050904#_CAG_DO_mCherry_DIO_EGFP
			EC_scope1		EGFP	mCherry	Overlay
				Slice	Type 1	Type 2	Type 3	Type 4	Type 5	Type 6	Type 7		C-pos	Z-pos	T-pos
				1	33	26	1	0	0	0	0	1	1	1
				2	0	0	0	0	0	0	0	2	1	1
				3	0	0	0	0	0	0	0	3	1	1
				Total	33	26	1	0	0	0	0
			EC_scope2
				Slice	Type 1	Type 2	Type 3	Type 4	Type 5	Type 6	Type 7		C-pos	Z-pos	T-pos
				1	11	0	0	0	0	0	0	1	1	1
				2	40	27	0	0	0	0	0	2	1	1
				3	0	0	0	0	0	0	0	3	1	1
				Total	51	27	0	0	0	0	0
			EC_scope3
				Slice	Type 1	Type 2	Type 3	Type 4	Type 5	Type 6	Type 7		C-pos	Z-pos	T-pos
				1	88	0	0	0	0	0	0	1	1	1
				2	0	26	0	0	0	0	0	2	1	1
				3	0	0	1	0	0	0	0	3	1	1
				Total	88	26	1	0	0	0	0
													Ratio
				Scope	EGFP	mCherry	Overlay		EGFP+	mCherry+	Double+		EGFP+	mCherry+	Double+
20201116\M2020050903#_CAG_DO_mCherry_DIO_EGFP				1	32	31	3		29	28	3		0.483333	0.466667	0.05
20201117\M2020050903#_CAG_DO_mCherry_DIO_EGFP				1	95	33	9		86	24	9		0.722689	0.201681	0.0756303
				2	44	49	2		42	47	2		0.461538	0.516484	0.021978
				3	37	40	0		37	40	0		0.480519	0.519481	0
20201117\M2020050904#_CAG_DO_mCherry_DIO_EGFP				1	33	26	1		32	25	1		0.551724	0.431034	0.0172414
				2	51	27	0		51	27	0		0.653846	0.346154	0
				3	88	26	1		87	25	1		0.769912	0.221239	0.00884956
												avg	0.58908	0.386106	0.0248142
												std	0.126079	0.13297	0.0281909
												N	7	7	7
												sem	0.0476535	0.0502578	0.0106551
												t-test	0.0822003
													mean	sem
												EGFP+	0.58908	0.0476535
												mCherry+	0.386106	0.0502578
												Double+	0.0248142	0.0106551
													mean	sem
												EGFP+	0.58908	0.0476535
												mCherry+	0.386106	0.0502578
												Double+	0.0248142	0.0106551

## Sheet: 20201123ProjectionStrength
SUBJECT		SCOPE	CHANNEL		Area	Mean	Min	Max	IntDen	RawIntDen			SUBJECT		SCOPE	CHANNEL
2020050903#	C1-row1col3_EC_scope2_40x_z10_	1	mCherry	1	10771	2.342	0	255	25224.7	585480			2020050905#		1			Area	Mean	Min	Max	IntDen	RawIntDen
			EGFP	2	10771	9.874	0	255	106348	2468400				C1-col3row1_LA_scope1_40x_		mCherry	1	10771	7.25	0	255	78091.2	1812540
																EGFP	2	10771	2.917	0	255	31421	729300
					Area	Mean	Min	Max	IntDen	RawIntDen
	C1-row2col3_EC_scope3_40x_z12	2	mCherry	1	10771	2.1114	0	255	22741.8	527850
			EGFP	2	10771	18.8374	0	255	202896	4709340								Area	Mean	Min	Max	IntDen	RawIntDen
														C1-col3row2_LA_scope2_40x_	2	mCherry	1	10771	22.808	0	255	245666	5702055
					Area	Mean	Min	Max	IntDen	RawIntDen						EGFP	2	10771	2.81	0	255	30267.5	702525
	C1-row3col2_EC_scope1_40x_z10_	3	mCherry	1	10771	1.25562	0	255	13524.2	313905
			EGFP	2	10771	9.8481	0	255	106073	2462025
																		Area	Mean	Min	Max	IntDen	RawIntDen
					Area	Mean	Min	Max	IntDen	RawIntDen				C1-col4row2_LA_scope3_40x_	3	mCherry	1	10771	48.344	0	255	520710	12085980
2020050904#	C1-row1col3_LA_anterior_scope5_40x_	1	mCherry	1	10771	2.302	0	255	24796.3	575535						EGFP	2	10771	3.478	0	255	37463.5	869550
			EGFP	2	10771	3.359	0	255	36178.1	839715
																		Area	Mean	Min	Max	IntDen	RawIntDen
					Area	Mean	Min	Max	IntDen	RawIntDen			2020050906#	C1-col2row2_LA_scope2_40x_	1	mCherry	1	10771	6.635	0	255	71466.4	1658775
	C1-row2col3_LA_anterior_scope2_40x	3	mCherry	1	10771	1.234	0	255	13293.5	308550						EGFP	2	10771	2.223	0	255	23939.3	555645
			EGFP	2	10771	2.601	0	255	28015.3	650250
																		Area	Mean	Min	Max	IntDen	RawIntDen
					Area	Mean	Min	Max	IntDen	RawIntDen				C1-row2col1_LA_scope3_40x	3	mCherry	1	10771	5.953	0	255	64116.5	1488180
		4	mCherry	1	10771	0.829	0	255	8931.92	207315						EGFP	2	10771	2.055	0	255	22137.6	513825
		1116#	EGFP	2	10771	1.666	0	255	17940.8	416415
																		Area	Mean	Min	Max	IntDen	RawIntDen
															4	mCherry	1	10771	11.742	0	255	126475	2935560
															1117#	EGFP	2	10771	1.915	0	255	20621.4	478635
				Cre-	Cre+	Ratio												Cre+	Cre-	Ratio
				mCherry	EGFP													mCherry	EGFP
				25224.7	106348	0.23719												78091.2	31421	0.402364
				22741.8	202896	0.112086												245666	30267.5	0.123206
				13524.2	106073	0.127499												520710	37463.5	0.071947
				24796.3	36178.1	0.685393												71466.4	23939.3	0.334973
				13293.5	28015.3	0.47451												64116.5	22137.6	0.345271
				8931.92	17940.8	0.497857												126475	20621.4	0.163047
			avg	18085.4	82908.7	0.355756											avg	184421	27641.7	0.240135
			std
				DO_mCherry_DIO_EGFP					DIO_mCherry + FAS_EGFP
				Cre-	Cre+	Ratio			Cre+	Cre-	Ratio
				mCherry	EGFP				mCherry	EGFP
				25224.7	106348	0.23719			78091.2	31421	0.402364
				22741.8	202896	0.112086			245666	30267.5	0.123206
				13524.2	106073	0.127499			520710	37463.5	0.071947
				24796.3	36178.1	0.685393			71466.4	23939.3	0.334973
				13293.5	28015.3	0.47451			64116.5	22137.6	0.345271
				8931.92	17940.8	0.497857			126475	20621.4	0.163047
			avg	18085.4	82908.7	0.355756			184421	27641.7	0.240135
			std	7003.43	70570.4	0.231728			178178	6495.14	0.137308
			N	6	6	6			6	6	6
			sem	2859.14	28810.3	0.0946027			72740.9	2651.63	0.056056
				mCherry	EGFP				mCherry	EGFP
			avg	0.355756	1				1	0.240135
			sem	0.0946027	0				0	0.056056
			mCherry	0.355756	0.0946027			mCherry	1	0
			EGFP	1	0			EGFP	0.240135	0.056056
			mCherry	0.355756	0.0946027
