# Supplementary material for: The entorhinal cortex modulates trace fear memory formation and neuroplasticity in the mouse lateral amygdala via cholecystokinin
Source: eLife. 2021 Nov 15;10:e69333. doi: 10.7554/eLife.69333 (PMC8629425; doi:10.7554/eLife.69333)
Supplement: Figure 6—source data 1. [file elife-69333-fig6-data1.xlsx]

## Sheet: EYFP_AEP
																							time	average	std	N	sem
0.667746	0.820755	0.927309	1.3656	0.788495	1.1372	0.965461	1.19921	1.01539	1.17401	0.738071	0.983243	1.22754	0.985185	1.32051			1.40729	1.05407	1.08904	1.43849	1.3435		-20	1.08241	0.228406	20	0.0510731
0.92523	0.838703	0.958081	1.07346	0.265684	1.04582	1.14053	0.574513	1.08795	0.983634	1.03542	0.993225	0.91628	0.961982	1.32077		0.55441	0.701145	0.945978	1.13013	1.23664	1.00293		-19	0.937739	0.243294	21	0.053091
0.874991	0.98701	0.837845	0.897427	0.208731	1.09773	1.17701	0.851309	1.07008	1.05733	1.04225	0.940827	1.22351	1.27018	0.952888	1.18029	0.744179	0.421996	0.997099	0.99307	1.1703	1.07025		-18	0.957559	0.249454	22	0.0531838
0.825676	1.04192	0.871322	1.44201	1.52879	0.514427	0.827766	0.619331	1.07506	1.12231	1.3566	0.902537	0.386513	0.613044	1.09432	0.691368	0.773112	0.115804	1.16082	1.08215	1.22368	1.44922		-17	0.941717	0.36283	22	0.0773556
0.943209	0.877986	0.794207	0.649099	1.45433	0.570813	0.519218	1.03335	1.0552	1.28487	1.30306	1.09707	0.647913	1.17753	1.68753	0.721289	0.526909	0.688803	1.03666	0.885658	0.948341	1.10586		-16	0.95495	0.308769	22	0.0658297
0.927218	0.863938	0.843295	0.644671	1.36719	1.69637	0.846172	1.40013	1.00835	0.820157	1.243	1.19908	0.83939	0.643967	1.14891	0.678198	1.47295	0.817748	0.848525	0.840569	1.21515	0.900676		-15	1.01208	0.288324	22	0.0614708
1.1056	0.828876	0.898906	0.855355	0.88817	0.17962	1.17585	1.14022	0.906413	0.880763	1.04266	1.4214	0.825326	0.909747	1.24019		1.08341	0.274353	1.02522	1.0506	1.03278	1.10175		-14	0.946058	0.282264	21	0.061595
0.948885	0.912402	0.929658	0.188227	1.2465	0.896649	1.17978	1.45945	1.0048	1.08493	1.07125	1.34577	0.982127	0.84425	0.951129	0.646198	1.10129	1.11413	1.00524	0.88986	0.906306	0.891837		-13	0.981848	0.25088	22	0.0534878
1.18641	0.827876	0.883318	1.17179	0.886582	0.98964	0.843109	1.31267	0.924343	0.873797	0.960288	1.30577	0.919752	1.30755	0.529166	0.823414	1.51598	1.09147	0.862752	0.901793	0.606011	0.812507		-12	0.978909	0.238761	22	0.0509041
1.12515	0.947136	1.04422	1.13908	0.294105	1.11258	0.637476	1.04699	0.999754	0.88066	0.954571	1.38827	0.808001	0.447528			1.09801		1.15667	1.2096	0.85287	0.941405		-11	0.951793	0.263787	19	0.0605169
1.10798	0.942832	0.862368	1.23107	0.813738	1.2908	0.723459	0.870132	1.04908	0.941621	0.761396	1.15329	0.686007	0.82392	0.321767	0.603134	1.66985	1.17969	0.921577	1.05882	0.856564	0.796958		-10	0.939366	0.276433	22	0.0589357
1.02424	1.07403	1.05159	1.00754	0.707091	0.951017	0.925334	1.29681	0.922553	0.844969	0.815968	1.14651	0.897754	0.722574	1.07829	1.24026	0.884728	0.542995	1.02005	0.756988	0.896342	0.862942		-9	0.939572	0.177024	22	0.0377416
0.987769	1.17439	1.24738	1.02212	1.13016	1.98152	1.0491	1.38601	0.932977	0.924365	0.589248	1.11544	1.38231	1.37199	0.836494	0.429945	1.19906	1.64971	0.925261	1.33559	1.11591	1.18804		-8	1.13522	0.329428	22	0.0702342
1.09838	0.957955	1.00727	1.13434	1.58211	0.854602	1.62336	0.611658	1.10081	1.17696	1.0509	1.17735	1.05775	0.792338	0.776225	0.424866	0.478768	1.87323	1.19489	1.01955	0.985513	1.32113		-7	1.05909	0.347155	22	0.0740138
0.948616	1.21523	1.20641	0.643596	1.99371	0.951839	1.23009	1.00574	0.99866	0.917356	1.01501	0.853905	1.25295	1.14465	0.927547	1.20578	0.491618	2.61457	1.01117	1.0522	1.17709	1.05849		-6	1.13256	0.433074	22	0.0923317
1.22369	1.23146	1.21567	0.936009	0.980494	0.241516	0.858765	0.716868	1.05112	1.0175	0.947823	0.649985	1.0154	1.31339	0.727487	0.634814	0.778572	1.87357	1.35281	1.38061	0.798395	0.600392		-5	0.979379	0.347557	22	0.0740993
1.10395	1.26022	1.10331	0.728024	1.53569	0.707174	1.03992	0.78871	0.995029	1.06949	0.772091	0.599833	0.88652	0.627885	1.29145	0.646503	0.926879	0.499116	1.10959	1.35657	0.877835	0.989196		-4	0.950682	0.26879	22	0.0573062
1.18289	1.15889	1.14595	1.20464	0.789345	0.330952	1.15163	0.982411	0.972143	1.2359	0.922054	0.390067	1.35722	0.969318	0.909285	1.22745	1.46989	1.25884			0.931636	0.923128		-3	1.02568	0.285196	20	0.0637718
1.043	0.963283	0.998278	1.18633	0.445937	2.17784	1.34459	0.497103	1.01887	1.05243	1.20125	0.800279	1.41293	1.50125	1.18807	1.54065	0.779628	1.2792	0.909094	0.824638	0.753845	0.879175		-2	1.08171	0.379888	22	0.0809924
0.749388	1.0751	1.17361	1.47961	1.09313	1.2719	0.741382	1.2074	0.811408	0.656959	1.17708	0.536142	1.2748	1.57171	1.60735	1.61941	0.631252	0.568678	0.979006	0.899205	0.976307	0.760621		-1	1.03916	0.340346	22	0.0725619
0	0	0	0	0	0	0	0	0	0	0	0	0	0	0	0	0	0	0	0	0	0			0	0	22	0
0	0	0	0	0	0	0	0	0	0	0	0	0	0	0	0	0	0	0	0	0	0			0	0	22	0
0	0	0	0	0	0	0	0	0	0	0	0	0	0	0	0	0	0	0	0	0	0			0	0	22	0
1.1492	0.81166	0.966133	1.11784	0.819232	1.50165	1.21201	0.883892	0.87109	1.01972	1.2036	0.923991	1.44056	1.25715	1.78228	1.35559	0.390236	1.37059	1.08741	1.23663	1.10406	1.07354		1	1.11719	0.289934	22	0.0618142
1.04528	1.06405	1.08605	1.50759	0.729726	2.55216	1.09767	0.890507	0.829653	0.641536	0.794191	0.949911	1.04057	1.27565	1.55064	1.19694	1.75167	0.69297	1.13636	1.01297	0.803275	0.583418		2	1.10149	0.439733	22	0.0937513
1.01978	0.795324	0.99281	2.01394	0.433604	1.02297	1.1921	0.855152	0.863434	0.825835	0.982501	0.880041	0.859182	0.627751	1.25033	0.531493	0.372118	0.518956	1.12859	1.0737	0.999233	0.714371		3	0.906964	0.344524	22	0.0734529
0.938221	0.845874	0.84747	1.50133	0.241464	0.879119	0.633603	0.859293	0.846608	0.888008	1.03881	1.11462	1.07988	0.747942			1.55459	0.650875	0.824458	1.03584	1.27875	1.05917		4	0.943296	0.294268	20	0.0658003
1.09399	0.918054	0.969306	1.19913	0.520839	1.10903	1.01549	0.868895	0.855737	0.557806	0.99977	1.03953	1.70578	1.04985			1.05193	0.395982	0.79741	1.11008	1.19926	0.917714		5	0.968779	0.279215	20	0.0624343
1.12488	1.11728	1.04003	1.91855		1.07897	1.0816	0.673526	0.980081	0.796838	1.19282	0.889432	1.99056	0.9933	0.638816	0.604993	1.57929		1.01772	0.9047	1.37382	1.25714		6	1.11272	0.373441	20	0.083504
0.725492	0.950098	0.851815	0.97794	0.928149	0.798701	0.856149	1.15242	1.0718	0.943351	1.22051	1.04558	1.60413	1.33354	1.41552	1.67398	1.15918		0.951736		1.46537	1.16927		7	1.11474	0.267709	20	0.0598615
0.997346	0.970478	1.08228	0.91193	0.887337	1.19084	1.10944	1.02958	0.966973	0.779616	1.2536	0.990371	1.58674	0.740583	1.46943	0.71197	1.79373	0.536077	1.02975	0.941425	1.32613	1.27355		8	1.07178	0.294692	22	0.0628287
0.878149	0.761835	0.806146	1.76909	1.01374	0.648049	1.65088	1.13792	1.04973	0.627874	1.29766	1.15232	1.74946	0.703554	1.55704	0.376061	0.263706	0.560099	1.11655	1.37412	1.14682	0.875847		9	1.02348	0.424451	22	0.0904932
0.864255	1.14409	1.31143	0.629957	0.515499	0.834482	1.05668	1.18084	1.05488	0.747188	0.937564	0.836389	1.00967	0.544124	0.895056	0.80476	1.01871	1.70628	1.25207	1.39369	1.53175	1.34708		10	1.02802	0.310872	22	0.0662781
1.12143	0.902119	1.13834	0.430539	0.686671	1.61953	0.555989	1.62006	0.905104	0.918081	0.993349	1.24664	2.08434	1.35898	1.24917	1.01321	0.917308	1.33523	1.03028	0.727433	1.05843	0.888686		11	1.08186	0.374018	22	0.0797408
0.992151	0.953669	0.988474	0.902296	1.20612	1.2842	0.87107	0.882126	0.889264	0.594416	1.06785	1.21374	1.76758	1.4093	1.26437	1.45823	1.33837	1.51082	0.930564	0.894658	1.01098	0.977117		12	1.10943	0.272366	22	0.0580687
1.20563	1.07955	1.0684	0.920997	1.40719	0.62129	0.884573	1.50675	1.04753	0.91679	0.92912	1.03193	1.68651	0.380682	0.841613	0.531462	0.15241		0.834757	1.09209	1.43519	1.03467		13	0.981387	0.366816	21	0.0800457
1.07819	0.884628	1.05098	0.911121	0.870808	0.518335	1.40045	1.46919	1.0193	0.936552	1.03245	1.13841	2.08975	0.765569	1.13489	1.05218	1.07638	1.43992	1.04162	1.02236	1.26809	1.32778		14	1.11495	0.311475	22	0.0664067
0.789024	0.662162	0.971483	0.397733	0.897906	0.297619	1.09168	0.971798	1.23515	0.746176	1.31742	1.01867	1.78055	0.65332	1.48842	2.03515	0.685191	1.31118	1.17271	0.944839	1.09641	1.14012		15	1.03203	0.410033	22	0.0874194
0.740889	0.81203	1.14538	1.38203	0.736384	0.784432	1.30439	0.700621	0.814628	1.04208	1.26147	0.988589	1.87182	1.09091	1.71727	1.79841	1.24476	0.740913	0.856483	0.814356	1.09744	1.3431		16	1.10402	0.356167	22	0.075935
0.650716	1.15698	1.04844	1.1828	0.945629	0.330284	0.86637	0.823697	0.938487	0.841855	1.25234	0.909327	0.884887	0.879044	1.99632	1.22626	2.28828		1.2607	1.24895	1.1704	0.76902		17	1.07956	0.423929	21	0.0925089
0.582353	0.7329	0.947456	1.06003	0.743407	1.1878	0.474919	1.04859	1.01995	1.0044	1.02144	1.27	1.96018	1.47482	1.78481	1.35851	0.293341	1.89923	0.719068	0.648776	1.35685	1.07792		18	1.07576	0.442629	22	0.0943689
0.680643	0.570976	0.742947	0.750652	0.937784	1.04544	0.835723	0.777761	0.925951	0.963382	1.35106	1.21153	1.29249	0.751176	1.27256	2.21327		1.77368	0.824089		1.36857	0.867428		19	1.05786	0.402701	20	0.0900468
0.370007	0.877778	1.13832	0.688279	0.579278	0.785186	0.611632	0.704025	0.875803	0.844756	1.27195	1.16383	1.25582	1.39795	1.29896	1.15879	1.44392	2.19706		0.725696	1.22475	1.02399		20	1.03037	0.400339	21	0.087361
1.04699	1.10534	1.10118	1.05733	1.10714	1.07592	1.06876	0.936282	0.985266	0.983755	0.925283	0.842281	1.12236	1.0839	0.966397	0.957282	0.931024	1.33396	1.04705	1.07602	0.936944	0.938007
0.825026	0.888807	1.05015	0.841494	0.866061	0.846236	0.904862	1.06231	0.975095	0.868698	1.13055	1.09355	1.6076	0.973261	1.35849	1.33184	1.04587	1.54604	0.992234	0.951284	1.23808	1.07245

## Sheet: CHETA_AEP
															Time	average	std	N	sem
1.01468	0.649065	0.938386	0.947273	0.992535		1.5704	1.50155	0.688471	1.38597	1.47833	0.59882	0.738448			-20	1.04199	0.355468	12	0.102615
1.24429	1.64882	1.18307	0.465208	0.83339		0.706584	0.949068	1.58173	2.16736	0.64186	0.815612	1.03967			-19	1.10639	0.490433	12	0.141576
1.98169	0.653362	0.986349	1.92777	0.72481		0.759946	0.542448	1.35711	0.694384	2.15952	0.871317	1.02432			-18	1.14025	0.574775	12	0.165923
0.770123	0.420285	0.777612	0.407445	0.933007			1.15328	0.327894	1.2585	1.11085	0.429649	0.946046			-17	0.775882	0.335262	11	0.101085
0.583498	0.931286	0.622201	1.31535	1.09605		0.477329	0.487131	0.653314	0.806665	0.682323	0.909174	1.0807			-16	0.803752	0.265759	12	0.076718
1.07695	1.34956	0.918013	0.545716	1.59789		2.09494	1.07716	1.11161	1.25553	0.681969	0.3724	1.12681			-15	1.10071	0.464237	12	0.134014
1.34208	0.324984	1.39072	0.984251	0.590638		0.681066	0.86879	0.774536	0.950371	0.737821	0.555299	1.24159			-14	0.870179	0.328635	12	0.0948687
0.881639	1.11668	0.888208	1.22844	1.17378	2.45767	0.896217	1.39266	0.563063	1.24776	1.05544	0.481383	0.909381			-13	1.09941	0.484454	13	0.134363
1.17499	0.792678	0.0926052	0.0948538	1.12692	1.27205	1.34619	0.608301		0.571929	1.09838	1.17394	0.484015			-12	0.819737	0.445088	12	0.128486
0.282181	1.2688	0.640896	1.03864	1.09479	0.262784	0.738009	1.69316	0.886383	1.24345	0.23261	0.856138	0.584631			-11	0.832498	0.438664	13	0.121663
1.2896	1.2949	1.15945	1.31469	0.862998	1.95941	1.39204	0.513926	1.12116	1.27027	0.691527	1.31056	1.23641			-10	1.18592	0.354771	13	0.0983958
0.12898	1.05978	1.03833	0.694636	0.998633	0.359788	1.62916	0.540893		0.477143	0.983479	1.92803	1.43813			-9	0.939749	0.535703	12	0.154644
1.26391	1.02115	0.40496	1.88471	0.912452	0.938233	0.244566	0.543651	1.29689	0.896057	0.753457	0.544638	1.39118			-8	0.93045	0.452265	13	0.125436
0.914847	1.43	1.04225	0.353144	0.7678	1.10893	1.25637	1.53586	1.07956	0.78294	1.86926	1.2303	1.26068			-7	1.12553	0.382557	13	0.106102
1.39786	1.09923	1.14818	2.02734	1.52418	1.56573	0.322697	0.442181	1.5325	0.469011	0.346846	1.57718	1.812			-6	1.17423	0.591624	13	0.164087
1.06684	1.40051	0.979106	0.869693	1.31402	0.654735	1.66024	0.953709	1.23229	0.895203	1.38255	1.37539	0.997757			-5	1.13708	0.280787	13	0.0778762
1.62699	0.993761	1.22574	1.08271	1.42228	0.678951	0.35787	1.72802	0.597898	1.26538	0.107724	1.45061	0.5576			-4	1.00735	0.50835	13	0.140991
0.695181	1.85403	1.71241	1.14716	0.198018	0.568032	0.713432	1.63671	0.950878	0.550816	0.252377	1.24915	0.632832			-3	0.935463	0.545788	13	0.151374
0.364089	0.156513	1.52231	0.777341	1.14291	0.480298	1.27498	1.75866	0.999889	0.58392	1.55322	1.52594	0.999959			-2	1.01077	0.511061	13	0.141743
0.899584	0.633565	1.64264	1.78155	0.692896	0.693385	0.877961	0.0728406	1.24481	1.22733	2.12501	1.29104	1.12442			-1	1.10054	0.545974	13	0.151426
0	0	0	0	0	0	0	0	0	0	0	0	0				0	0	13	0
0	0	0	0	0	0	0	0	0	0	0	0	0				0	0	13	0
0	0	0	0	0	0	0	0	0	0	0	0	0				0	0	13	0
5.42624	0.739534	1.585	2.0913	1.31375	0.490466	0.904002	1.36813	1.13533	0.38086	1.73347	1.53812	1.73729			1	1.57258	1.26512	13	0.35088
6.42612	1.02378	1.71922	1.5856	1.11132	1.32438	1.7085	1.86391	1.15856	0.624721	0	2.01735	1.45329			2	1.6936	1.52266	13	0.42231
7.03223	1.76143	1.75698	1.53936	1.36645	0.792394	1.60384	1.87008	1.18556	0.493866	1.8845	1.50715	1.02861			3	1.8325	1.61895	13	0.449015
6.70902	1.58199	1.70418	2.0335	1.37797	0.918466	0.489411	1.71814	1.28778	1.44164	2.74703	1.21025	0.853079			4	1.85173	1.56489	13	0.434023
6.5643	2.15947	2.08036	1.8565	0.785506	1.45671	2.6806		0.979399	1.56019	3.69189	1.36855	1.23745			5	2.20174	1.58711	12	0.458158
5.62296	2.59011	1.69097	0.758751	0.652259	0.509347	2.95874	1.20974	0.639861	1.92593	2.32138	2.01039	0.782846			6	1.82102	1.40583	13	0.389907
7.73998	0.807454	1.41628	1.03959	1.17327	0.458696	2.2615	0.619579	0.75943	2.25914	1.22833	2.10712	1.166			7	1.77203	1.89074	13	0.524396
5.7204	2.46512	1.99746	1.39506	1.69519	0.163593	1.56875	2.56818	0.737434	1.19987	2.41572	2.34283	1.88425			8	2.01183	1.32079	13	0.366322
5.91923	1.5583	2.50689	1.27527	1.04946	0.458873	2.24292	0.353505	1.98466	1.74654	3.5663	2.19609	1.97088			9	2.06376	1.44021	13	0.399442
4.39167	2.54009	1.4628	1.08543	0.947887	1.25284	0.575483	0.922256	0.777977	1.5423	3.40161	2.94702	1.33305			10	1.78311	1.1687	13	0.324138
6.18775	2.9631	1.57824	2.32248	1.03402	1.71379	3.09062	0.99188	1.52109	1.99264	2.31459	2.29038	1.08075			11	2.23702	1.36915	13	0.379734
5.31741	2.51558	1.46311	1.05282	1.21434		1.06738	1.44567	2.08835	2.05326	0.667748	2.42946	0.819721			12	1.84457	1.25495	12	0.362273
6.03592	2.63701	2.38559	1.98317	1.36035	0.953896	2.93996	2.43264	1.37138	3.06387	3.19345	1.74395	0.678222			13	2.36765	1.36701	13	0.379139
7.70812	2.45306	1.9948	2.18603	0.834225	1.591	1.68576	2.05463	1.18267	3.19453	2.11799	2.77645	1.0408			14	2.37077	1.73914	13	0.48235
8.45575	3.35593	1.28333	1.04254	1.26894	1.70262	3.39186	2.25625	0.80189	2.47643	1.30069	2.48054	1.28065			15	2.39211	2.00982	13	0.557424
6.21396	2.22486	1.4949	1.61172	1.49787	2.28712	2.52257	0.984235	1.27855	3.09777	1.87079	1.71205	0.990532			16	2.13745	1.36784	13	0.379372
7.27524	3.33037				0.893626	2.76078	1.75566	1.36364	1.87622	2.53402	1.86691	1.52117			17	2.51776	1.81758	10	0.574769
8.46561	2.67972				1.0424	2.04715	2.19677	1.59641	3.35563	2.38013	1.60726	1.16192			18	2.6533	2.15916	10	0.682787
9.98717	3.00317				2.20584	2.94719	2.3567	2.30357	3.32948	0.856566	2.16687	1.05916			19	3.02157	2.57147	10	0.81317
6.87319	2.21953					3.17231	2.23675	1.46836	3.04921	2.34694	1.56442	1.45327			20	2.70933	1.68414	9	0.56138

## Sheet: CHETA_VEP
												Time	Average	Std	N	Sem
0.9632		1.07721	1.04488	0.801309	1.15042	0.45266	0.276413	0.993925		0.832944		-20	0.843662	0.296345	9	0.0987818
1.50029		0.385985	1.06284	0.511494	1.64609	0.277818	0.410017	1.00267		0.98944		-19	0.865182	0.499185	9	0.166395
1.05752		0.394686	1.14184	1.5686	0.236266	0.0701821	0.173422	0.915598		0.896793		-18	0.717212	0.517479	9	0.172493
0.940305	0.715029	1.35507	0.870513		1.25637	0.724723	0.793155	1.07776	0.872669	0.817374		-17	0.942297	0.219651	10	0.0694597
1.46402	1.03236	2.31199	1.26924	0.725742	0.873601	0.195406	0.327857	1.41132	0.761125	0.622259		-16	0.999539	0.59745	11	0.180138
1.19206	1.06043	0.531836	0.983939		0.650791	1.76498	1.71588	0.371684	1.31748	1.08571		-15	1.06748	0.46392	10	0.146704
1.1533	1.04463	0.306071	0.945342	2.07382	0.493793	1.40612	1.83267	1.13038	0.522885	1.17247		-14	1.09832	0.542741	11	0.163643
0.827657	0.850656	0.805074	0.959396	0.628329	0.345498	1.18339	1.31675	1.56604	0.734046	1.24884		-13	0.951427	0.349176	11	0.10528
1.45204	1.17318	1.00284	0.810641	1.60138	1.52502	0.496288	0.411564	0.987213	0.688185	1.12635		-12	1.02497	0.401743	11	0.12113
1.16698	0.934949	1.22322	0.879192	1.20572	1.34077	0.322474	0.214003	0.944174	1.2706	1.57212		-11	1.00674	0.41653	11	0.125588
1.15176	1.35622	0.490626	0.982169	0.767224	1.4706	0.762594	0.663341	1.41581	1.46477			-10	1.05251	0.367633	10	0.116256
0.736163	0.885098	1.25114	1.07599	0.761256	0.216616	1.45386	1.63787	0.518039	0.949258	0.501691		-9	0.907908	0.427212	11	0.128809
0.809359	0.751865	1.50809	1.26102	1.01866	1.22366	1.10339	1.05488	0.367779	1.72767			-8	1.08264	0.387183	10	0.122438
1.15051	1.62691	0.949316	1.27168	0.331893	0.614391	1.04902	0.977956	1.11827	0.58703	0.74717		-7	0.947649	0.361705	11	0.109058
1.40447	1.20777	0.548262	1.02327	1.64048	1.73776	1.68906	1.4373	0.491946	1.52712	0.714923		-6	1.22021	0.459968	11	0.138686
0.596629	0.78438	1.36759	1.10824	0.556498	2.16765	1.33819	1.54391	1.13623	0	1.01548		-5	1.05589	0.575395	11	0.173488
0.480885	0.245421	0.369776	1.0139	0.224096	1.54623	1.52412	1.40196	0.665354	0.875862	1.13614		-4	0.862158	0.500983	11	0.151052
0.635193	1.10164	0	0.916476	0.275641	1.236	1.1491	1.06869	1.47711	0.725239	1.28982		-3	0.897719	0.450531	11	0.13584
0.723843	1.71164	1.69783	0.724274	1.3358	0.369948	1.87985	1.79585	1.31256	1.25209	1.22339		-2	1.27519	0.494071	11	0.148968
0.593814	0.517819	1.42337	0.775155	1.97205	0.602859	0.970589	0.917133	1.09614	0.723983	1.00709		-1	0.963637	0.425271	11	0.128224
0	0	0	0	0	0	0	0	0	0	0			0	0	11	0
0	0	0	0	0	0	0	0	0	0	0			0	0	11	0
0	0	0	0	0	0	0	0	0	0	0			0	0	11	0
0.752284	1.21254	1.09329	0.697875	0.211591	0.506962			1.00294		0.0379719		1	0.689433	0.418345	8	0.147907
0.316388	0.244154	0.368514	0.50941	1.1705	0.639584	1.02795	0.94813	0.622785	0.669178	0.432208		2	0.631709	0.303747	11	0.0915832
	1.12607	1.78257	0.797929	0.791552	0.763595	0.333679	0.477343	0.733408	1.37546	1.31166		3	0.949327	0.443362	10	0.140203
		0.660083	1.05978	2.01008	1.195	1.54151	1.6721	1.31618	1.31784	1.05553		4	1.31423	0.393342	9	0.131114
0.356167	3.26422	2.24878	0.754949	0.5918	0.837297	2.11899	2.21731	0.778785	1.41873	0.575666		5	1.37843	0.944291	11	0.284714
1.72112	0.505596	1.19058	0.929267	0.917997	0.887971	0.770237	0.868375	1.07411	1.15816	0.58116		6	0.964052	0.32968	11	0.0994023
1.30028	0.758621	0.692169	0.12343	1.24376	0.76211	1.05687	0.950819	0.523445	1.23753	1.11638		7	0.887765	0.359407	11	0.108365
	0.321531	0.307922	0.533529	0.460539	0.941746	3.34124	3.23786	0.48725	0.772769	0.917629		8	1.1322	1.15889	10	0.366474
1.44166	1.69845		1.04849	0.717609	1.87343		0.0573195	1.12719	1.45682	0.615631		9	1.11518	0.577681	9	0.19256
1.03267	0.521235		0.549768	0.253203	1.27327	1.70051	1.12644	0.44988	1.15715	1.69171		10	0.975583	0.513366	10	0.16234
0.626919	0.937823		0.73457	0.804872	1.02999	1.92595	1.83637	1.86763	2.11297	0.844985		11	1.27221	0.585368	10	0.18511
0.910816	0.486766		1.30489	1.52472	1.48474	2.122	1.77198	0.36906	2.24072	1.21767		12	1.34334	0.626766	10	0.198201
2.34967	1.65917		1.37696	0.130806	1.55203	1.89769	1.63335	1.29926	0.768369	0.638905		13	1.33062	0.653701	10	0.206718
1.24615	2.34356		0.966925	0.593073	0.513079	1.89799	1.80206	0.826731	0.986838	0.506392		14	1.16828	0.642034	10	0.203029
1.58295	2.72503		0.391229	1.90932	0.212372	1.8492	1.92486	0.764316	0.623725	1.2065		15	1.31895	0.811881	10	0.256739
1.1419	0.96897		0.716026	0.357095	1.50041	1.58518	1.68645	1.37364	1.13511	1.08498		16	1.15498	0.408797	10	0.129273
2.22558			0.907745	1.79821	0.921253	2.06525	2.12052	1.03398	1.02264			17	1.5119	0.591557	8	0.209147
1.36825	0.0248243		0.678347	0.945845	0.917609	0.419265	0.360828	1.5314				18	0.780796	0.513188	8	0.181439
0.77429	0.756382		0.902228	1.05995	0.725668	2.19887	2.09728	0.477702				19	1.12405	0.653529	8	0.231057
1.62663	1.87235		0.995831	0.608827	1.12896	0.882715	0.838096	0.729875				20	1.08541	0.44367	8	0.156861

## Sheet: Summary
	Time	CHETA-AEP	SEM	CHETA-VEP	SEM	EYFP-AEP	SEM
	-20	1.04199	0.10261	0.84366	0.09878	1.08241	0.05107
	-19	1.10639	0.14158	0.86518	0.16639	0.93774	0.05309
	-18	1.14025	0.16592	0.71721	0.17249	0.95756	0.05318
	-17	0.77588	0.10109	0.9423	0.06946	0.94172	0.07736
	-16	0.80375	0.07672	0.99954	0.18014	0.95495	0.06583
	-15	1.10071	0.13401	1.06748	0.1467	1.01208	0.06147
	-14	0.87018	0.09487	1.09832	0.16364	0.94606	0.06159
	-13	1.09941	0.13436	0.95143	0.10528	0.98185	0.05349
	-12	0.81974	0.12849	1.02497	0.12113	0.97891	0.0509
	-11	0.8325	0.12166	1.00674	0.12559	0.95179	0.06052
	-10	1.18592	0.0984	1.05251	0.11626	0.93937	0.05894
	-9	0.93975	0.15464	0.90791	0.12881	0.93957	0.03774
	-8	0.93045	0.12544	1.08264	0.12244	1.13522	0.07023
	-7	1.12553	0.1061	0.94765	0.10906	1.05909	0.07401
	-6	1.17423	0.16409	1.22021	0.13869	1.13256	0.09233
	-5	1.13708	0.07788	1.16148	0.15218	0.97938	0.0741
	-4	1.00735	0.14099	0.86216	0.15105	0.95068	0.05731
	-3	0.93546	0.15137	0.98749	0.11271	1.02568	0.06377
	-2	1.01077	0.14174	1.27519	0.14897	1.08171	0.08099
	-1	1.10054	0.15143	0.96364	0.12822	1.03916	0.07256
	0
	0
	0
	1	1.57258	0.35088	0.68943	0.14791	1.11719	0.06181
	2	1.6936	0.42231	0.63171	0.09158	1.10149	0.09375
	3	1.8325	0.44902	0.94933	0.1402	0.90696	0.07345
	4	1.85173	0.43402	1.18281	0.17614	0.9433	0.0658
	5	2.20174	0.45816	1.37843	0.28471	0.96878	0.06243
	6	1.82102	0.38991	0.96405	0.0994	1.11272	0.0835
	7	1.77203	0.5244	0.88776	0.10837	1.11474	0.05986
	8	2.01183	0.36632	1.02927	0.3471	1.07178	0.06283
	9	2.06376	0.39944	1.11518	0.19256	1.02348	0.09049
	10	1.78311	0.32414	0.97558	0.16234	1.02802	0.06628
	11	2.23702	0.37973	1.27221	0.18511	1.08186	0.07974
	12	1.84457	0.36227	1.34334	0.1982	1.10943	0.05807
	13	2.36765	0.37914	1.33062	0.20672	0.98139	0.08005
	14	2.37077	0.48235	1.16828	0.20303	1.11495	0.06641
	15	2.39211	0.55742	1.31895	0.25674	1.03203	0.08742
	16	2.13745	0.37937	1.15498	0.12927	1.10402	0.07594
	17	2.51776	0.57477	1.5119	0.20915	1.07956	0.09251
	18	2.6533	0.68279	0.7808	0.18144	1.07576	0.09437
	19	3.02157	0.81317	1.12405	0.23106	1.05786	0.09005
	20	2.70933	0.56138	1.08541	0.15686	1.03037	0.08736
