# Supplementary material for: The entorhinal cortex modulates trace fear memory formation and neuroplasticity in the mouse lateral amygdala via cholecystokinin
Source: eLife. 2021 Nov 15;10:e69333. doi: 10.7554/eLife.69333 (PMC8629425; doi:10.7554/eLife.69333)
Supplement: Figure 7—source data 1. [file elife-69333-fig7-data1.xlsx]

## Sheet: AntiCCK
																					Time	AVG	STD	N	SEM
0.524333	1.55933	1.57994	1.57585	0.586669	1.69728	0.903771	0.942459	1.30283	0.941731	0.942579	1.12088		0.669462	0.722985		0.600485	1.07383	1.19457	0.978048		-20	1.05095	0.3704	18	0.0873042
1.50829	1.00971	1.30834	1.15784	1.7055	1.19038	0.889176	0.93443	0.899088	1.02989	0.601265	1.07734		0.571449	0.399786	0.814454	1.00684	1.17714	1.18692	1.26474		-19	1.03856	0.315488	19	0.072378
0.624868	1.16448	0.435909	1.06299	0.867795	1.34969	0.999638	0.999212	0.744709	1.0006	0.759972	0.520987		1.07767	0.992985	0.708838	0.964238	1.05011	0.71823	0.794369		-18	0.886173	0.229988	19	0.0527628
1.30601	0.80651	0.292941	0.492331	0.654438	1.22319	1.08979	0.939444	1.3726	1.57129	0.913665	1.23771		0.905832	1.09989	0.956255	0.652795		1.0145	1.05385		-17	0.976836	0.31934	18	0.0752692
1.34468	1.24579	0.592026	0.351735	1.37056	1.33603	0.846336	1.1094	1.12735	0.779411	1.09484	1.25706		1.20987	1.20217	1.00194	0.474919	0.645156	0.874529	0.831351		-16	0.983955	0.308896	19	0.0708657
1.14306	0.628885	1.15996	0.5892	0.634814	0.982976	1.11978	0.995053	1.21301	1.29826		1.27461		0.947894	1.06179	0.849538	0.74699	1.06783	1.11687	0.814229		-15	0.980264	0.223508	18	0.0526813
1.48183	0.938762	0.90315	1.0449	1.0232	1.25606	0.673701	1.12142	0.770716	1.77981	0.62213	0.99996		0.944377	0.901433	0.932352	0.861913	1.02359	0.947699	0.919807		-14	1.00773	0.266992	19	0.0612522
0.954794	1.02349	1.04277	1.39	1.31501	0.969483	1.02548	0.558232	1.17578	0.903301	0.417858	1.2562	0.774368	1.09001	1.05392	1.17397	1.21937	0.822159	1.00859	1.06703		-13	1.01209	0.237404	20	0.0530851
1.29202	0.119896	1.45641	0.799674	0.0402634	0.651642	1.43053	1.03178	1.50461	0.624666	1.06922	1.09142	0.802547	0.968145	1.17376	1.23379	1.04707	0.946963	1.23018	1.07936		-12	0.979697	0.392474	20	0.0877598
1.35843	0.596474	0.633764	1.01429	0.0974959	1.24324	1.0635	1.29234	0.714369	0.781365	0.580938	1.21778	1.27722	0.924238	0.777859	0.985051	0.838309	1.27783				-11	0.92636	0.33247	18	0.0783639
1.09449	0.916203	0.675201	0.583008	0.531236	1.14993	0.862577	1.11313	1.20788	0.934905	0.796084	1.16776	1.19967	1.27491	1.07588	0.641685	1.01367	1.24781	1.14794	1.28631		-10	0.996013	0.240737	20	0.0538304
0.695738	1.343	1.36817	0.702082	1.51062	1.46259	1.07306	0.931304	1.19864	0.212879	1.22896	1.12126	1.33516	1.05329	1.03397	0.94628	1.11663	1.33693	1.15698	0.826399		-9	1.0827	0.308629	20	0.0690116
0.55819	1.19396	2.38802	0.665315	0.917217	1.20303	0.920754	0.711107	1.23613	1.2276	1.14711	0.588818	1.13265	0.886587	1.02812	1.20612	0.919155	1.05845	0.980329	0.922698		-8	1.04457	0.380984	20	0.0851907
0.390253	1.18306	0.777134	1.12928	1.55623	0.439031	1.04536	0.978312	0.427211	1.07189	1.1628	0.862329	1.42015	1.14712	1.26311	1.03734	1.0849	0.918351	1.08345	1.11074		-7	1.0044	0.305951	20	0.0684128
0.808391	1.5126	0.551248	1.36106	0.858155	1.06854	1.10805	1.11119	0.519087	0.884977	1.65349	1.03955	0.945428	0.987893	0.965415	1.41406	1.1848	1.00565	1.04102	0.971526		-6	1.04961	0.282509	20	0.0631709
	1.02533	1.03484	0.982607	1.06316	1.10824	1.29136	1.21853	0.49076	1.06835	1.03924	1.35648	0.612546	1.13754	1.17381	0.791861	0.945181	0.839541	0.784843	1.03348		-5	0.999879	0.218817	19	0.0502
1.07243		0.676087	1.04625	0.984984	0.433424	0.879474	0.949105	0.478257	0.78455	1.60132	0.537216	0.800422	1.0839	1.19948	0.769594	1.60937	0.997239	0.776069	1.09848		-4	0.935666	0.319491	19	0.0732963
0.858532	1.46597	1.95779	2.12491	1.51423	0.317929	0.606701	0.868649	0.808885	1.33164	0.99516	0.994152	0.911512	1.23782	1.07624	1.11893	1.40034	0.568248	0.911868	0.824196		-3	1.09469	0.444764	20	0.0994523
1.13136	0.356232	0.441275	1.374	1.71662	0.739838	1.02473	0.983159	1.0276	0.872923	0.948757	0.951094	0.876687	0.875077	1.03778	1.09528	1.33355	0.923798	1.07155	1.16246		-2	0.997188	0.297137	20	0.066442
0.852288	0.910317	0.725025	0.55266	1.05181	0.177494	1.14623	1.21176	1.78049	0.899966	1.42461	0.327404	0.911631	1.27506	1.08508	1.32267	0.979486	1.01938	0.753869	0.960932		-1	0.968408	0.365674	20	0.0817671
0	0	0	0	0	0	0	0	0	0	0	0	0	0	0	0	0	0	0	0			0	0	20	0
0	0	0	0	0	0	0	0	0	0	0	0	0	0	0	0	0	0	0	0			0	0	20	0
0	0	0	0	0	0	0	0	0	0	0	0	0	0	0	0	0	0	0	0			0	0	20	0
0.264054	0.126135	1.48262	0.698606	0.636376	1.01168	0.992122	1.20254	1.10701	0.6216	1.62636	0.664184	1.21566	1.29109	1.10633	1.34971	1.30093	1.19419	0.923071	1.12798		1	0.997113	0.389159	20	0.0870185
1.40917	0.868051	0.106205	0.878727	0.92068	0.63708	0.82651	1.11733	0.826785	1.49062	1.5326	1.08072	1.08151	1.38332	0.966873	0.629422	1.26845	1.92555	0.770582	0.832989		2	1.02766	0.39915	20	0.0892527
0.445716	0.938678	0.963891	0.959804	1.76635	0.550612	0.581898	0.849642	2.18078	0.848124	1.87769	0.635392	1.11026	1.12143	0.848661	0.840558	1.22236	1.65743	1.0186	1.23661		3	1.08273	0.464391	20	0.103841
2.08606	0.410206	0.700449	1.5683	0.404295	1.27803	1.1711	0.581507	0.493001	1.60088	1.46713	0.485696	0.978569	1.52083	0.947086	0.906951	1.84456	1.93247	0.890378	1.07562		4	1.11716	0.52749	20	0.11795
0.275729	0.599085		1.96312	1.10999	0.310406	0.397896	1.08372	0.418156	1.1513	1.20365	1.05096	1.03921	1.09721	1.08021	1.03596	1.4988	1.37199	1.22955	1.2395		5	1.00823	0.433989	19	0.0995639
1.12535	1.21697	0.373579	0.925828	1.4574	0.922781	1.57877	0.96532	0.594293	0.749598	2.56178	1.42737	1.13638	0.995476	0.783939	0.622354	1.48359	1.34604	1.00196	0.788428		6	1.10286	0.473278	20	0.105828
1.12556	0.316461	1.44764	1.61483	0.913276	1.15916	0.959199	1.0811	0.467914	1.1702	0.406851	0.909231	0.980189	1.21161	0.851417	0.665614	0.860366	0.684886	1.26022	0.715319		7	0.940052	0.336341	20	0.075208
1.57831	1.05886	0.800218	2.03026	1.40918	0.658248	0.77907	0.840449	0.653244		0.565164	0.96322	1.17778	1.35689	1.0191	0.755351	1.84386	1.02475	0.604416	0.795848		8	1.04812	0.421275	19	0.0966471
	0.224203	0.45967	1.23232	1.12996	1.16877	1.12889	1.00426	0.739188	1.07324	1.28957	1.06654	0.852817	0.716493	0.753426	1.20587	1.18643	1.163	0.731434	1.01905		9	0.955008	0.285972	19	0.0656064
1.17417		0.80979	1.21594	1.09116	1.29317	0.928844	1.0327	0.788167	1.44061	1.06162	1.06259	1.13696	0.945653	1.01377	0.835588	1.1628	2.20201	0.793131	0.970761		10	1.10313	0.318163	19	0.0729916
1.10208	0.00850354	0.864483	1.58482	1.68136	1.3326	1.28198	0.934958	0.91659	1.48352	1.89012	1.07565	1.1033	0.928432	0.714083	0.818898	0.688745	0.280015	0.641331	0.934778		11	1.01331	0.45458	20	0.101647
1.18175	0.629473	0.70875	2.07474	1.49896	0.686474	0.886464	1.35403	1.03238	1.1192		0.591336	1.53343	0.830678	0.825288	0.462712	1.46359	1.97744	0.604721	0.856639		12	1.06937	0.4694	19	0.107688
1.13136	0.810633	0.970282	2.41487	0.610188	0.772647	0.936649	0.817275	0.790486	0.582393	0.493634	0.543959	1.15756	0.872048	0.879754	1.05866	1.12094	2.44598	1.15417	1.03788		13	1.03007	0.520692	20	0.11643
0.598325	0.503577	0.861639	2.85855	1.10039	1.33384	0.872703	1.03714	0.954419	0.523679	2.05477	0.748632	1.16817	1.07793	0.91117	1.02109	1.01269	2.22807	0.646006	0.928032		14	1.12204	0.598618	20	0.133855
0.432599	0.87499	0.503738	1.521	1.30816	1.6819	0.91416	1.03514	1.06937	1.0924	1.00125	1.02843	0.692395	1.18759	0.871303	0.821319	1.14248	1.02958	0.476445	0.920549		15	0.98024	0.317066	20	0.0708981
	0.121705	0.452163	1.33337	1.95849	0.368179	0.0715979	1.12242	1.1229	0.972658	0.689184	0.644811	0.975494	0.913627	0.696974	0.687577	1.47533	1.73526	0.790236	0.662669		16	0.883929	0.498997	19	0.114478
0.717069	0.882487	0.510327	1.41352	0.502135	1.16976	1.48243	0.802928	0.975158	1.19053	0.846144	1.3088	0.985796	0.972018	0.718173	0.992503	0.642659	0.345388	0.817121	0.931871		17	0.91034	0.301124	20	0.0673333
1.73641			1.25105	1.40659	0.864518	0.805099	1.35665	0.764175	1.04773	1.99681	0.483439	1.24431	1.33276	1.10695	0.778132	1.13612	1.18008	0.864409	0.926614		18	1.12677	0.366949	18	0.0864907
1.0818	0.462618	1.16937	1.33714	0.564815	1.47172	1.08267	0.953935	0.698632	0.918288	2.03005	0.810912	1.20296	1.16923	0.890288	1.23353	1.76168	1.32705	0.845671	0.886442		19	1.09494	0.379258	20	0.0848047
0.422277	0.813101	0.510361	1.40437	1.0522	1.38231	0.616042	1.07833	0.751381	1.22079	1.44973		1.26438	0.851486	0.583382	1.18338	0.597544	1.51969	0.871183	0.922543		20	0.973394	0.343799	19	0.0788729

## Sheet: AntiScramble
															Time	AVERAGE	STD	N	SEM
1.2635	1.04991	0.650737	1.52755	0.849217	0.96906	1.16962	1.45009	1.62212	1.27014	0.8248	0.841572	1.00623			-20	1.11496	0.298786	13	0.0828684
0.566736	1.2335	1.02005	1.62256		0.959786	0.774201	1.07641	1.09206	1.036	0.853651	1.10383	1.02339	0.722649		-19	1.00652	0.259414	13	0.0719484
1.14712	0.705011	1.25363	1.12452	1.00116	0.906561	0.556855	0.542366	0.282936	0.857334	0.693789	0.945489	0.803998	0.646032		-18	0.819057	0.268851	14	0.0718534
1.17371	0.874978	1.3913	1.37028	0.815787	0.890465	1.19958	1.34503	0.653642	0.743873	0.593826	1.17402	0.577955	1.09355		-17	0.992714	0.291915	14	0.0780176
0.832085	0.985659	1.44265	0.3987	0.693981	0.685578	1.21329	0.952615	0.764087	0.576499	0.599617	0.977453	0.952768	0.799986		-16	0.848212	0.269137	14	0.07193
1.52865	0.630407	1.69463	0.560531	0.807373	1.12854	1.22689	1.61627	1.0171	0.746784	0.55575	1.10914	0.922281	0.890211		-15	1.03104	0.377736	14	0.100954
1.43254	0.764335	1.47587	0.71785	0.762873	0.997099	1.25654	1.18928	0.973167	0.768842	0.489527	1.10721	0.878999	0.651926		-14	0.961861	0.297196	14	0.0794291
1.12138	0.958766	1.218	0.931835	0.703807	0.925121	1.03499	1.19876	0.990254	0.838527	0.552106	0.922867	0.954964	0.668374		-13	0.929982	0.191906	14	0.0512892
1.22269	1.11027	0.799088	1.01781	1.28074	1.11728	0.972244	0.773894	1.24163	0.878763	1.00738	1.17027	0.694999	0.350036		-12	0.974078	0.25647	14	0.0685445
1.29651	1.18601	0.567532	1.35404	0.803172	1.12512	0.935699	0.560414	1.68366	1.05771	0.858304	1.00337	1.01455	0.699121		-11	1.01037	0.312151	14	0.083426
1.81075	1.23727	0.869139	1.10467	1.34858	1.0618	1.02532	0.784253	0.821693	1.01364	0.877059	0.918669	0.78538	0.606513		-10	1.01891	0.299206	14	0.0799662
1.12072	0.86377	0.826036	0.441715	0.636749	1.27386	1.05667	1.09193	1.26756	1.21688	0.737771	1.39444	0.896335	0.812149		-9	0.974042	0.273617	14	0.0731273
0.348192	1.04234	0.80362	1.13066	1.36627	0.670829	0.953176	1.06108	0.667836	1.51877	1.46353	1.0702	0.800636	1.2141		-8	1.00794	0.329878	14	0.0881635
0.96045	0.977116	0.737517	0.980793	0.649048	1.24993	1.10961	1.01081	0.37167	1.33713	1.38718	0.749586	1.3293	1.25542		-7	1.00754	0.29911	14	0.0799405
0.431684	1.2013	0.800476	1.10837	1.11672	1.12036	0.952493	0.793854	1.52248	1.45891	1.13786	1.13312	1.31602	1.3955		-6	1.10637	0.291695	14	0.0779588
0.691893	1.0221	0.863749	0.534647	0.587121	0.880423	0.68437	0.494187	1.31722	1.24563	1.19153	0.877378	1.35112	1.62796		-5	0.954952	0.347813	14	0.0929569
0.764002	1.07373	0.962918	1.36516	1.37808	1.12824	0.978171	1.08482	0	0.899122	1.28216	1.29258	1.29841	1.21464		-4	1.05157	0.354767	14	0.0948155
1.00488	0.917638	0.830688	1.00571	1.16214	1.01219	1.0957	1.19102	1.15879	0.731068	1.12699	0.984501	1.08579	1.27401		-3	1.04151	0.146711	14	0.0392103
0.760029	0.987571	0.734504	0.91869	1.26256	1.09924	0.922542	0.74451	0.789655	0.942555	1.7537	1.13359	1.11336	1.40836		-2	1.04078	0.287522	14	0.0768434
0.522466	1.17832	0.950456	0.783904	1.77463	1.14572	0.948702	0.991577	0.597439	0.861838	1.86465	0.856562	1.19353	1.66947		-1	1.09566	0.415086	14	0.110936
0	0	0	0	0	0	0	0	0	0	0	0	0	0		0	0	0	14	0
0	0	0	0	0	0	0	0	0	0	0	0	0	0			0	0	14	0
0	0	0	0	0	0	0	0	0	0	0	0	0	0			0	0	14	0
0.787031	1.11297	0.790584	1.9263	1.67435	1.2729	0.962853	1.23363	2.5748	1.19848	2.35022	1.53243	1.48306	1.72541		1	1.47322	0.540346	14	0.144414
1.42428	0.810138	0.969759	1.27346	1.73293	1.60919	0.968008	1.19366	1.78986	1.25102	2.32463	1.37605	1.1302	1.8705		2	1.40883	0.416598	14	0.11134
2.07662	0.931446	0.672304	1.79356		1.67993	0.66162	0.880764	1.51491	1.18734	1.78858	1.02621	1.37602	1.75127		3	1.33389	0.471808	13	0.130856
1.951	0.952726	0.823794	0.943802		1.82789	0.594271	0.848327	2.07885	1.01815	1.7626	1.16459	1.47299	1.55034		4	1.30687	0.490674	13	0.136089
0.906901	0.994657	1.08348	1.13824	1.05593	1.09683	0.822203	0.956464	2.80919	1.05391	2.46306	1.23966	1.31107	2.26257		5	1.37101	0.639626	14	0.170947
1.20371	1.22124	1.10899	1.07828	2.10599	1.56861	1.11396	1.47167	1.40018	0.950318	2.48327	1.47867	1.06044	2.35036		6	1.47112	0.496295	14	0.13264
1.26994	1.52348	1.21083	1.52476	0.425955	1.09136	1.07392	1.5065	1.74966	0.962359	2.14955	1.82371	1.15625	1.75118		7	1.37282	0.436132	14	0.116561
1.8436	1.20943	0.713048	1.25196	0.743556	1.06079	0.931709	1.04504	2.53934	0.892441	2.07795	1.15641	1.07001	1.28299		8	1.27273	0.525408	14	0.140421
1.444	1.41384	1.15948	0.550617	0.96529	1.45787	1.26323	1.33279	2.11874	0.933761	2.30697	0.517176	1.2567	2.13259		9	1.34665	0.544219	14	0.145449
0.986284	1.14633	1.18656	1.47598	1.4668	1.798	1.45996	1.47456	1.61501	0.794244	2.34672	1.54505	1.26661	1.87951		10	1.46012	0.390904	14	0.104473
2.02569	1.28849	1.09831	1.48176	2.47899	1.05225	0.80587	0.902932	0.442266	1.06699	2.16739	1.30065	1.05605	2.0598		11	1.37339	0.592093	14	0.158244
1.71701	1.24595	0.92119	0.449987	1.17141	1.23021	1.3664	1.21434	2.2477	1.05925	1.68406	0.918072	1.28315	2.00765		12	1.3226	0.465697	14	0.124463
1.97259	1.31496	1.00914	0.459341	1.05349	1.34307			2.70012	1.03518	1.98311	0.983892	1.13993	1.76606		13	1.39674	0.605586	12	0.174818
2.49379	0.816494	1.01766	1.95292	1.82915	1.5619	1.05051	1.2215	1.75912	1.0658	1.69222	0.754372	1.28612	2.35347		14	1.48965	0.548116	14	0.14649
1.41804	1.07941	1.27802	0.838301	2.22097	1.14771	0.764065	1.16719	2.78548	1.09836	1.59035	0.81757	1.15893	2.00181		15	1.3833	0.583894	14	0.156052
1.95826	1.37563	1.17465	1.65253	0.927848	1.48047	0.979849	1.14861	1.76629	1.09065	1.78837	0.564481	1.43774	1.77956		16	1.36607	0.402308	14	0.107521
2.36205	1.16049	0.938301	3.61115	1.82035	1.12711	1.46549	1.60356	1.8682	0.881555	1.67846	0.261508	1.14559	2.29575		17	1.58711	0.814333	14	0.21764
1.59968	1.27486	1.11186	1.68479	0.320846	1.42396	0.882717	0.88402	1.34633	1.26911	1.77689	1.10411	1.35249	1.98522		18	1.28692	0.423716	14	0.113243
1.63342	1.21006	0.792178	2.07589	1.81351	0.665751	1.42789	1.45499	1.76357	0.842825	2.52718	0.823792	1.33098	1.95902		19	1.4515	0.551645	14	0.147433
1.84561	1.00233	0.892704	1.32411		1.38502	1.03104	1.20393	0.789724		1.81634	1.33869	1.0692	1.41874		20	1.25979	0.332759	12	0.0960594

## Sheet: Summary
	Time	Anti-Scramble	SEM	Anti-CCK	SEM
	-20	1.11496	0.08287	1.05095	0.0873
	-19	0.93463	0.09801	1.03856	0.07238
	-18	0.81906	0.07185	0.88617	0.05276
	-17	0.99271	0.07802	0.97684	0.07527
	-16	0.84821	0.07193	0.98395	0.07087
	-15	1.03104	0.10095	0.98026	0.05268
	-14	0.96186	0.07943	1.00773	0.06125
	-13	0.92998	0.05129	1.01209	0.05309
	-12	0.97408	0.06854	0.9797	0.08776
	-11	1.01037	0.08343	0.92636	0.07836
	-10	1.01891	0.07997	0.99601	0.05383
	-9	0.97404	0.07313	1.0827	0.06901
	-8	1.00794	0.08816	1.04457	0.08519
	-7	1.00754	0.07994	1.0044	0.06841
	-6	1.10637	0.07796	1.04961	0.06317
	-5	0.95495	0.09296	0.99988	0.0502
	-4	1.05157	0.09482	0.93567	0.0733
	-3	1.04151	0.03921	1.09469	0.09945
	-2	1.04078	0.07684	0.99719	0.06644
	-1	1.09566	0.11094	0.96841	0.08177
		--	--	--	--
		--	--	--	--
		--	--	--	--
	1	1.47322	0.14441	0.99711	0.08702
	2	1.40883	0.11134	1.02766	0.08925
	3	1.33389	0.13086	1.08273	0.10384
	4	1.30687	0.13609	1.11716	0.11795
	5	1.37101	0.17095	1.00823	0.09956
	6	1.47112	0.13264	1.10286	0.10583
	7	1.37282	0.11656	0.94005	0.07521
	8	1.27273	0.14042	1.04812	0.09665
	9	1.34665	0.14545	0.95501	0.06561
	10	1.46012	0.10447	1.10313	0.07299
	11	1.37339	0.15824	1.01331	0.10165
	12	1.3226	0.12446	1.06937	0.10769
	13	1.39674	0.17482	1.03007	0.11643
	14	1.48965	0.14649	1.12204	0.13386
	15	1.3833	0.15605	0.98024	0.0709
	16	1.36607	0.10752	0.88393	0.11448
	17	1.58711	0.21764	0.91034	0.06733
	18	1.28692	0.11324	1.12677	0.08649
	19	1.4515	0.14743	1.09494	0.0848
	20	1.25979	0.09606	0.97339	0.07887
