# Supplementary material for: The entorhinal cortex modulates trace fear memory formation and neuroplasticity in the mouse lateral amygdala via cholecystokinin
Source: eLife. 2021 Nov 15;10:e69333. doi: 10.7554/eLife.69333 (PMC8629425; doi:10.7554/eLife.69333)
Supplement: Figure 8—source data 1. [file elife-69333-fig8-data1.xlsx]

## Sheet: long trace
				baseline		test						baseline		test
				before	after	before	after					before	after	before	after
	JFH3222	Exp-1	CS	0.012037	0.0189815	0.1625	0.173611		JFH3222	Ctrl-1	CS	0.173333	0.0763889	0.309722	0.459722
	JFH3222	Exp-2	CS	0.0222222	0.134722	0.226389	0.159722		JFH3222	Ctrl-2	CS	0.0333333	0.0277778	0.0791667	0.326389
	JFH3222	Exp-4	CS	0.0240741	0.012963	0.201389	0.268056		JFH3716	Ctrl-3	CS	0.0615741	0.141667	0.0666667	0.540278
	JFH3716	Exp-8	CS	0.0226852	0.0416667	0.15	0.155556		JFH3063	Ctrl-6	CS	0.0287037	0.0685185	0.204167	0.534722
	JFH3063	Exp-9	CS	0.0916667	0.158333	0.122222	0.652778		JFH3926	Ctrl-9	CS	0.0569444	0.0740741	0.156944	0.466667
	JFH3063	Exp-10	CS	0.0152778	0.112037	0.1375	0.347222		JFH3927	Ctrl-10	CS	0.0393519	0.119907	0.143056	0.473611
	JFH3926	Exp-13	CS	0.0740741	0.0814815	0.0944444	0.351389		JFH3927	Ctrl-11	CS	0.154167	0.228241	0.240278	0.556944
	JFH3927	Exp-14	CS	0.0537037	0.0634259	0.25	0.556944		JFH3927	Ctrl-12	CS	0.159028	0.1875	0.256944	0.573611
									JFH3926	Ctrl-13	CS	0.0717593	0.115741	0.266667	0.686111
		CS-after	Exp-baseline	Ctrl-baseline	Exp-test	Ctrl-test			CS-before	Exp-baseline	Ctrl-baseline	Exp-test	Ctrl-test
			0.0189815	0.0763889	0.173611	0.459722				0.012037	0.173333	0.1625	0.309722
			0.134722	0.0277778	0.159722	0.326389				0.0222222	0.0333333	0.226389	0.0791667
			0.012963	0.141667	0.268056	0.540278				0.0240741	0.0615741	0.201389	0.0666667
			0.0416667	0.0685185	0.155556	0.534722				0.0226852	0.0287037	0.15	0.204167
			0.158333	0.0740741	0.652778	0.466667				0.0916667	0.0569444	0.122222	0.156944
			0.112037	0.119907	0.347222	0.473611				0.0152778	0.0393519	0.1375	0.143056
			0.0814815	0.228241	0.351389	0.556944				0.0740741	0.154167	0.0944444	0.240278
			0.0634259	0.1875	0.556944	0.573611				0.0537037	0.159028	0.25	0.256944
				0.115741		0.686111					0.0717593		0.266667
		Anova
		CS-after							CS-before
		subject	group	baseline	post-training				subject	group	baseline	post-training
		Exp-1	1	0.0189815	0.173611				Exp-1	1	0.012037	0.1625
		Exp-2	1	0.134722	0.159722				Exp-2	1	0.0222222	0.226389
		Exp-4	1	0.012963	0.268056				Exp-4	1	0.0240741	0.201389
		Exp-8	1	0.0416667	0.155556				Exp-8	1	0.0226852	0.15
		Exp-9	1	0.158333	0.652778				Exp-9	1	0.0916667	0.122222
		Exp-10	1	0.112037	0.347222				Exp-10	1	0.0152778	0.1375
		Exp-13	1	0.0814815	0.351389				Exp-13	1	0.0740741	0.0944444
		Exp-14	1	0.0634259	0.556944				Exp-14	1	0.0537037	0.25
		Ctrl-1	2	0.0763889	0.459722				Ctrl-1	2	0.173333	0.309722
		Ctrl-2	2	0.0277778	0.326389				Ctrl-2	2	0.0333333	0.0791667
		Ctrl-3	2	0.141667	0.540278				Ctrl-3	2	0.0615741	0.0666667
		Ctrl-6	2	0.0685185	0.534722				Ctrl-6	2	0.0287037	0.204167
		Ctrl-9	2	0.0740741	0.466667				Ctrl-9	2	0.0569444	0.156944
		Ctrl-10	2	0.119907	0.473611				Ctrl-10	2	0.0393519	0.143056
		Ctrl-11	2	0.228241	0.556944				Ctrl-11	2	0.154167	0.240278
		Ctrl-12	2	0.1875	0.629167				Ctrl-12	2	0.159028	0.256944
		Ctrl-13	2	0.115741	0.686111				Ctrl-13	2	0.0717593	0.266667

## Sheet: long delay
				baseline		test						baseline		test
	cage	subject		before	after	before	after		cage	subject		before	after	before	after
	JFH3110	Ctrl-4	CS	0.108796	0.103241	0.126389	0.655556		JFH3110	Exp-3	CS	0.00451389	0.00798611	0.0263889	0.75
	JFH3110	Ctrl-5	CS	0.146528	0.309028	0.286111	0.727778		JFH3110	Exp-5	CS	0.159259	0.141667	0.131944	0.727778
	JFH3371	Ctrl-7	CS	0.0226852	0.0430556	0.2	0.419444		JFH3371	Exp-6	CS	0.0935185	0.0856481	0.0875	0.777778
	JFH3371	Ctrl-8	CS	0.0523148	0.025463	0.190278	0.8875		JFH3371	Exp-7	CS	0.0814815	0.0972222	0.1125	0.729167
	JFH4149	Ctrl-14	CS	0.0274306	0.0538194	0.140278	0.8625		JFH4150	Exp-11	CS	0.176389	0.108796	0.327778	0.859722
	JFH4150	Ctrl-15	CS	0.0170139	0.0385417	0.0347222	0.509722		JFH4150	Exp-12	CS	0.1125	0.134259	0.1125	0.8625
	JFH4150	Ctrl-16	CS	0.0231481	0.00740741	0.176389	0.877778		JFH4149	Exp-16	CS	0.0898148	0.0375	0.0944444	0.797222
	JFH3746	Ctrl-17	CS	0.0180556	0.0458333	0.284722	0.788889		JFH3746	Exp-22	CS	0.0421296	0.0388889	0.301389	0.870833
	JFH3746	Ctrl-18	CS	0.0314815	0.0444444	0.0847222	0.641667		JFH3746	Exp-23	CS	0.050463	0.075463	0.240278	0.802778
	JFH3930	Ctrl-22	CS	0.0300926	0.0490741	0.0722222	0.843056		JFH3930	Exp-24	CS	0.100463	0.212037	0.101389	0.845833
									JFH3930	Exp-25	CS	0.0217593	0.0037037	0.0152778	0.777778
	origin plot	CS-after	Ctrl-baseline	Exp-baseline	Ctrl-test	Exp-test		origin plot	CS-before	Ctrl-baseline	Exp-baseline	Ctrl-test	Exp-test
			0.103241	0.00798611	0.655556	0.75				0.108796	0.00451389	0.126389	0.0263889
			0.309028	0.141667	0.727778	0.727778				0.146528	0.159259	0.286111	0.131944
			0.0430556	0.0856481	0.419444	0.777778				0.0226852	0.0935185	0.2	0.0875
			0.025463	0.0972222	0.8875	0.729167				0.0523148	0.0814815	0.190278	0.1125
			0.0538194	0.108796	0.8625	0.859722				0.0274306	0.176389	0.140278	0.327778
			0.0385417	0.134259	0.509722	0.8625				0.0170139	0.1125	0.0347222	0.1125
			0.00740741	0.0375	0.877778	0.797222				0.0231481	0.0898148	0.176389	0.0944444
			0.0458333	0.0388889	0.788889	0.870833				0.0180556	0.0421296	0.284722	0.301389
			0.0444444	0.075463	0.641667	0.802778				0.0314815	0.050463	0.0847222	0.240278
			0.0490741	0.212037	0.843056	0.845833				0.0300926	0.100463	0.0722222	0.101389
				0.0037037		0.777778					0.0217593		0.0152778
	CS-after								CS-before
	anova	strain	baseline	post-training					anova	strain	baseline	post-training
		Ctrl	0.103241	0.655556						Ctrl	0.108796	0.126389
		Ctrl	0.309028	0.727778						Ctrl	0.146528	0.286111
		Ctrl	0.0430556	0.419444						Ctrl	0.0226852	0.2
		Ctrl	0.025463	0.8875						Ctrl	0.0523148	0.190278
		Ctrl	0.0538194	0.8625						Ctrl	0.0274306	0.140278
		Ctrl	0.0385417	0.509722						Ctrl	0.0170139	0.0347222
		Ctrl	0.00740741	0.877778						Ctrl	0.0231481	0.176389
		Ctrl	0.0458333	0.788889						Ctrl	0.0180556	0.284722
		Ctrl	0.0444444	0.641667						Ctrl	0.0314815	0.0847222
		Ctrl	0.0490741	0.843056						Ctrl	0.0300926	0.0722222
		Exp	0.00798611	0.75						Exp	0.00451389	0.0263889
		Exp	0.141667	0.727778						Exp	0.159259	0.131944
		Exp	0.0856481	0.777778						Exp	0.0935185	0.0875
		Exp	0.0972222	0.729167						Exp	0.0814815	0.1125
		Exp	0.108796	0.859722						Exp	0.176389	0.327778
		Exp	0.134259	0.8625						Exp	0.1125	0.1125
		Exp	0.0375	0.797222						Exp	0.0898148	0.0944444
		Exp	0.0388889	0.870833						Exp	0.0421296	0.301389
		Exp	0.075463	0.802778						Exp	0.050463	0.240278
		Exp	0.212037	0.845833						Exp	0.100463	0.101389
		Exp	0.0037037	0.777778						Exp	0.0217593	0.0152778
