# Supplementary figures and images for: The entorhinal cortex modulates trace fear memory formation and neuroplasticity in the mouse lateral amygdala via cholecystokinin
Source: eLife journal article supplement (doi:10.7554/elife.69333), 2021-11-15

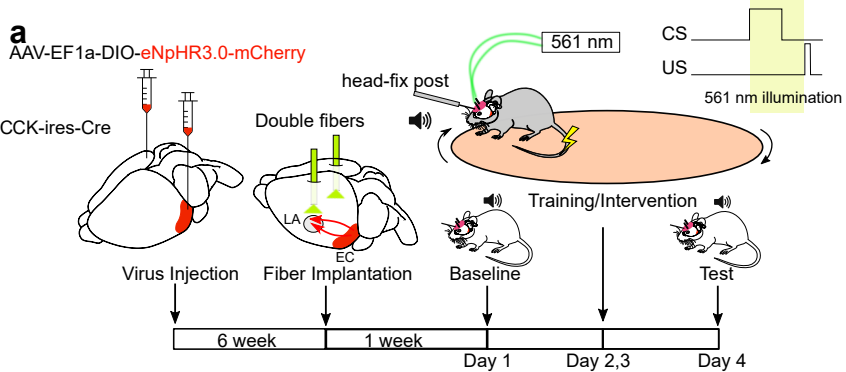

**b**

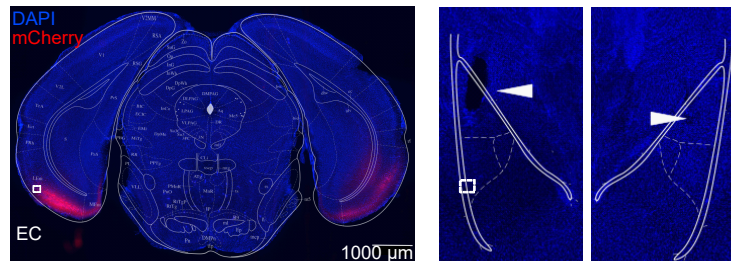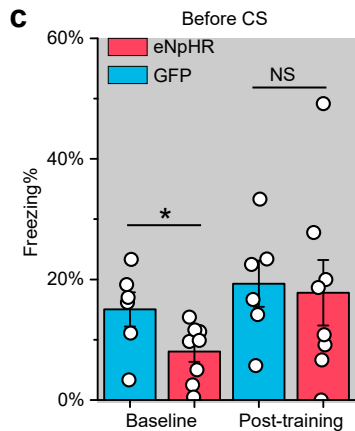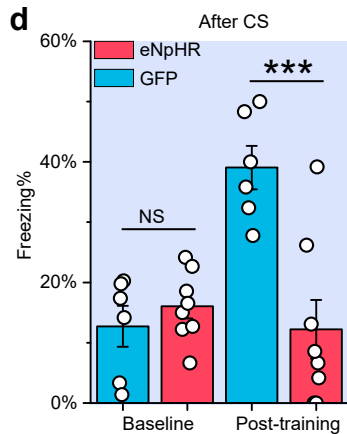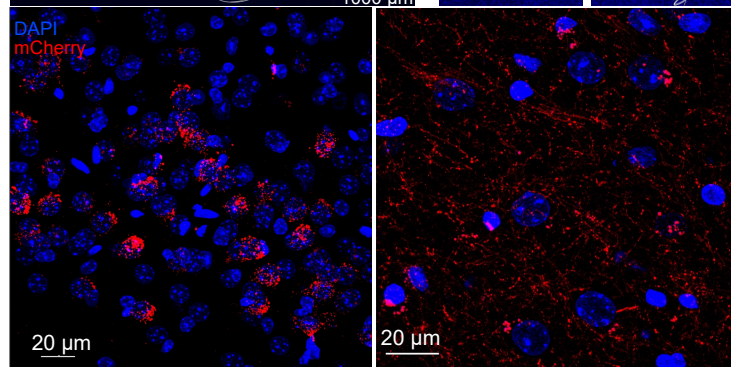

Supplement: supp [file elife-69333-supp-v1.zip]

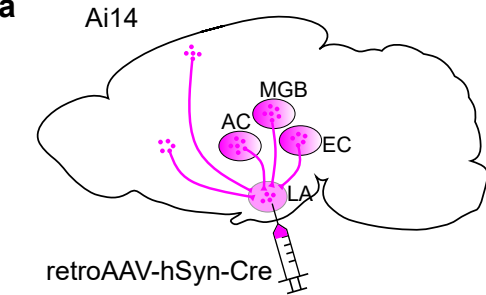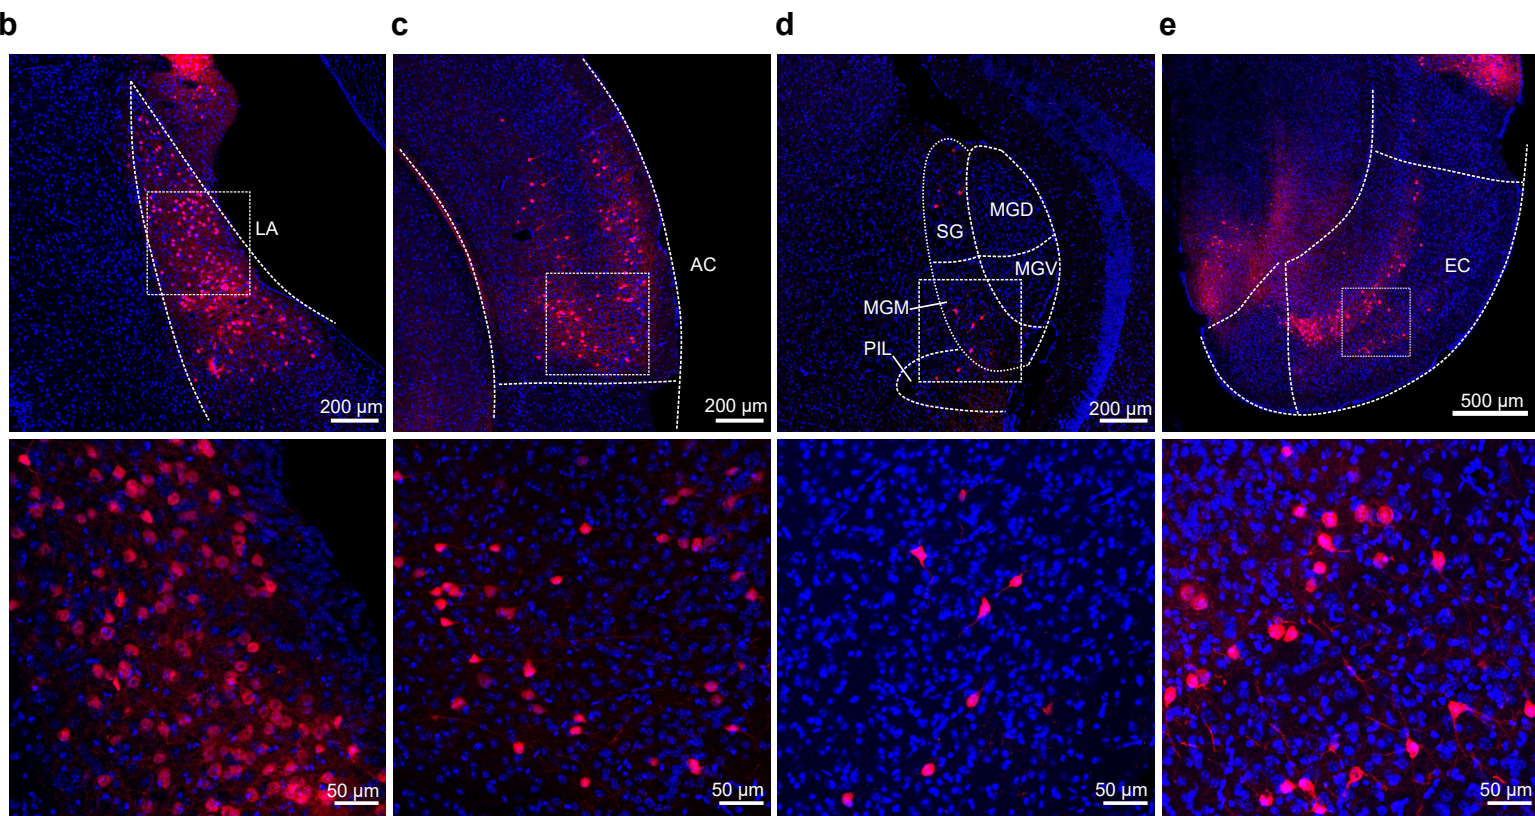

Supplement: supp [file elife-69333-supp-v1.zip]

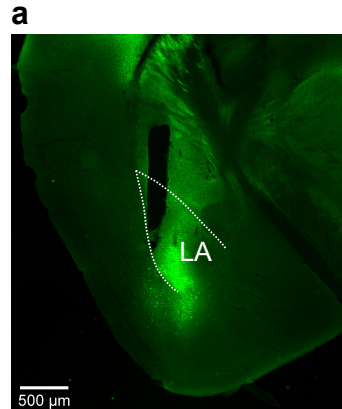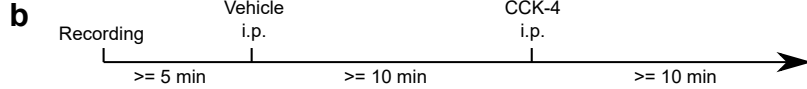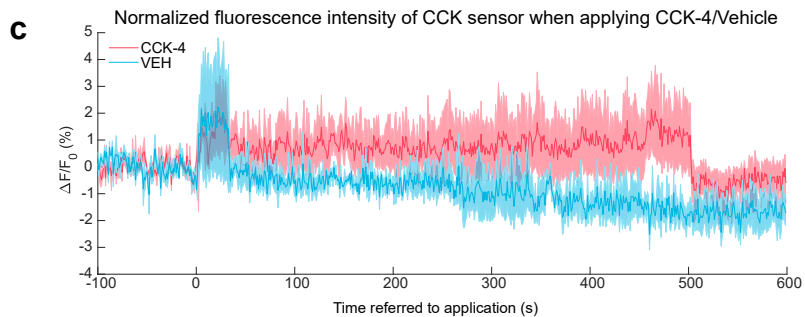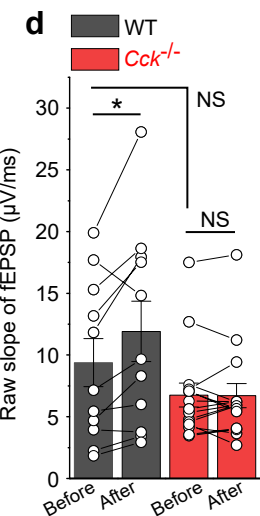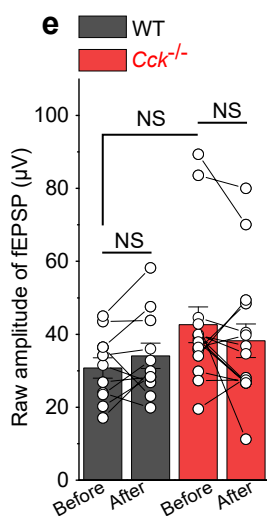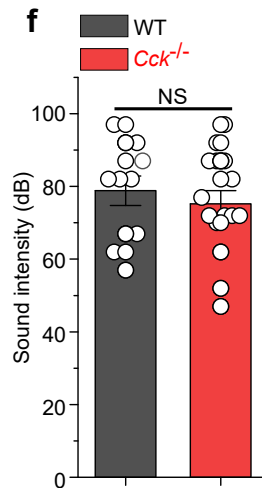

Supplement: supp [file elife-69333-supp-v1.zip]

**a**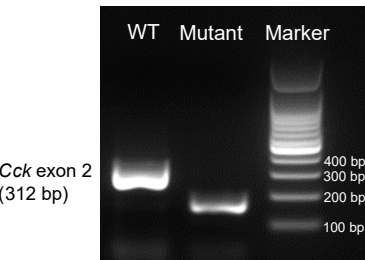**b**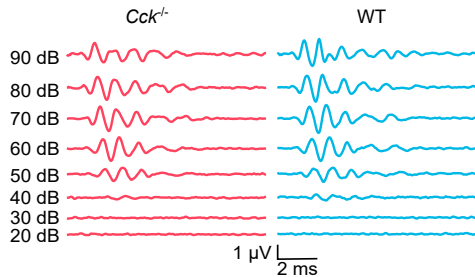**c**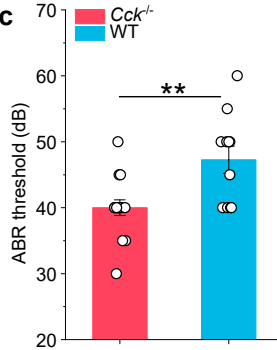**d**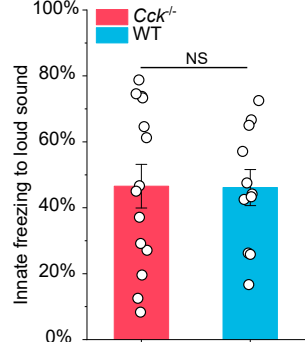**e**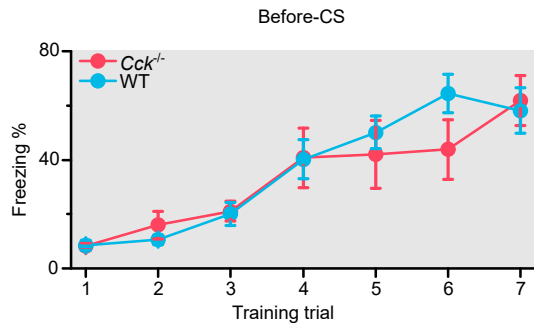**f**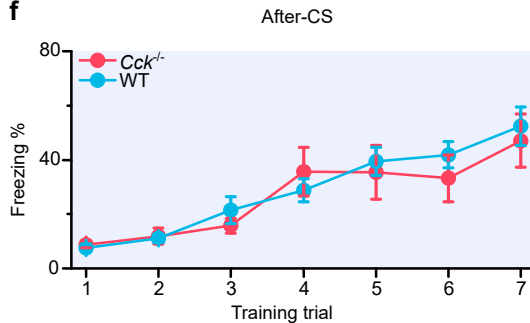

Supplement: supp [file elife-69333-supp-v1.zip]

C57BL/6

a

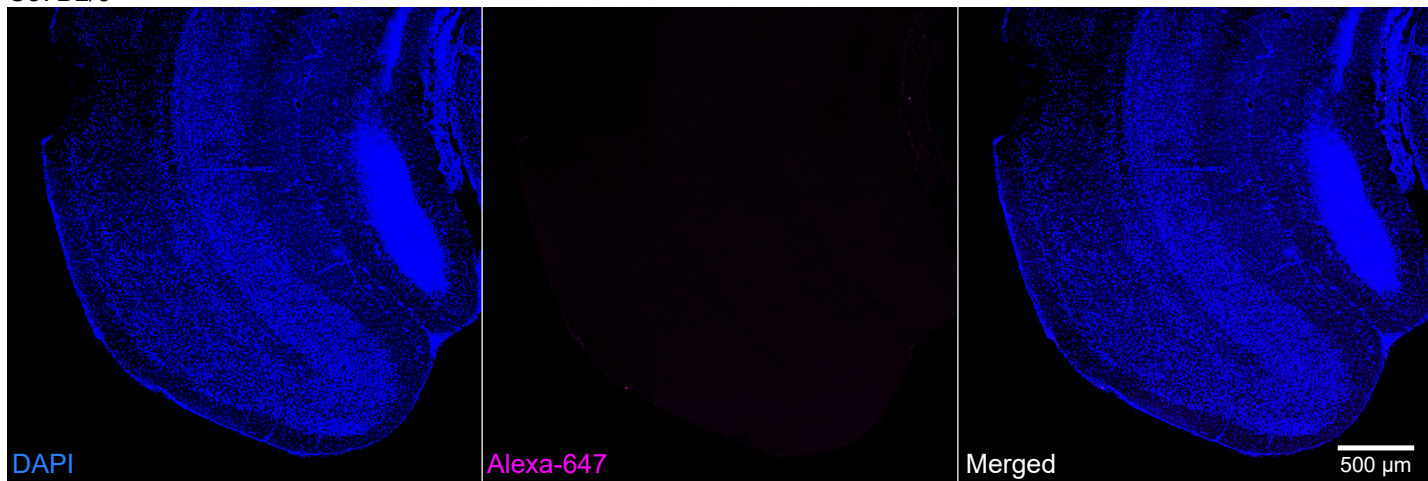

CCK-ires-Cre

b

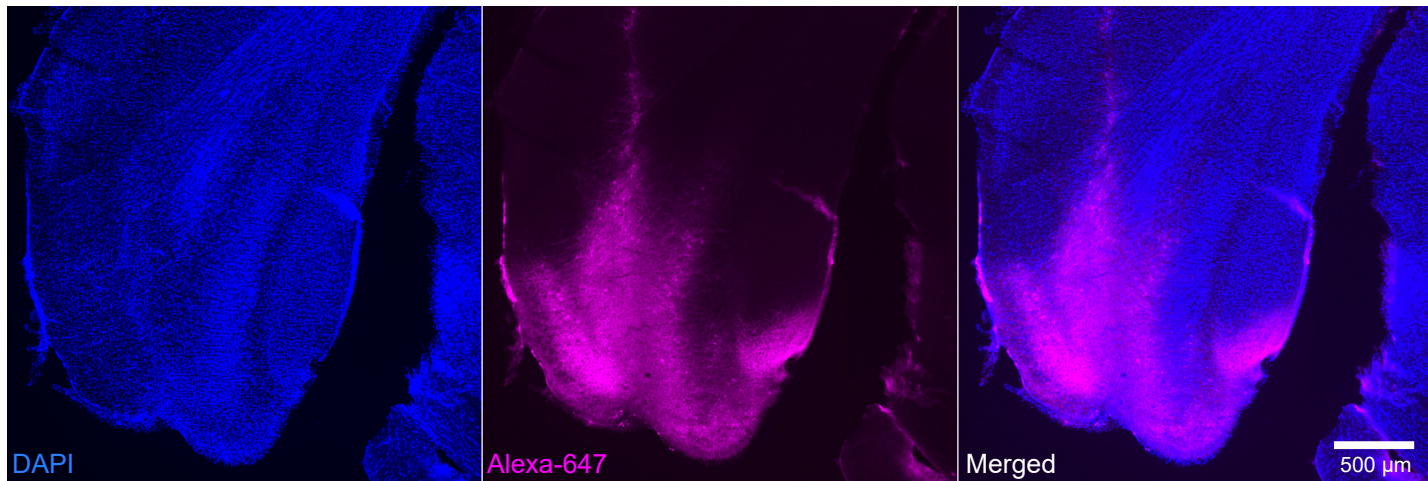

Supplement: supp [file elife-69333-supp-v1.zip]

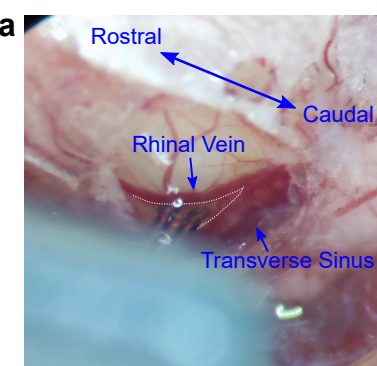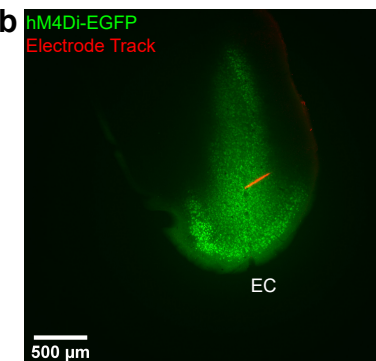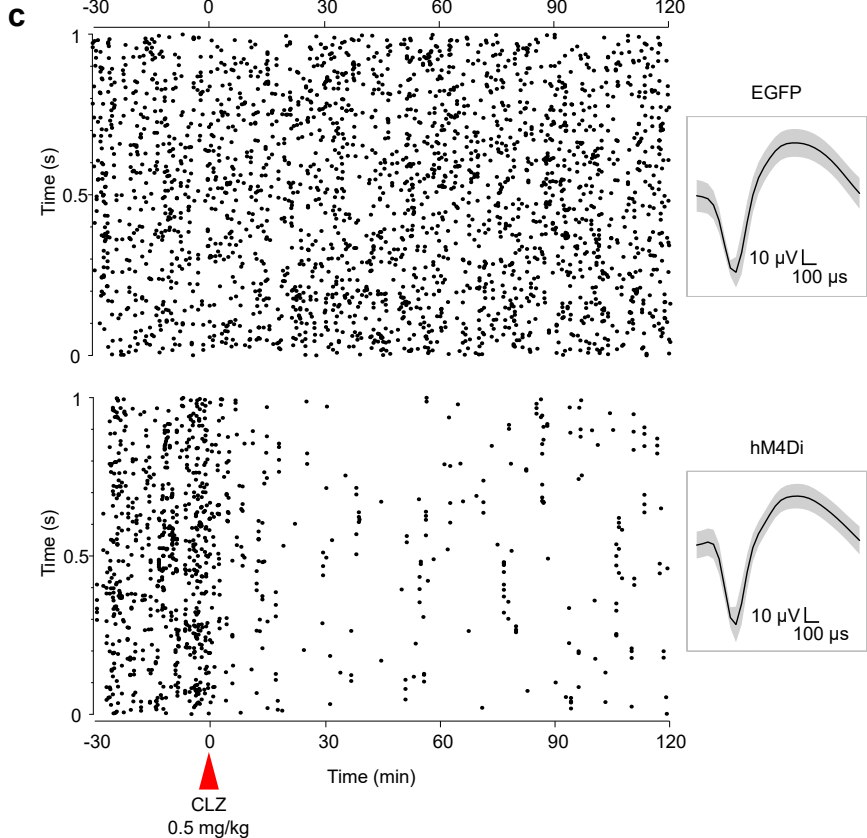

Supplement: supp [file elife-69333-supp-v1.zip]
